# Supplementary material for: The Greater Midlands—A Mid-Elevation Centre of Floristic Endemism in Summer-Rainfall Eastern South Africa
Source: MDPI journal article supplement (doi:10.3390/d15111137), 2023-11-09
Supplement: s1 [file s1]

## Supplementary Materials

**Table S1.** Summary of the spermatophytes (Divisions: Anthophyta and Cycadophyta) endemic to the Greater Midlands Centre of Floristic Endemism (GMCFE). Red List status and some distribution data were based on the SANBI Red List version 2020 [27]. Lithology followed the Geological Map of South Africa [33]. Abbreviations: EC, Eastern Cape; EI, Endemicity Index; FB; Forest Biome; KZN, KwaZulu-Natal; GB, Grassland Biome; Mtn, Mountain; SB, Savanna Biome. Taxa are listed alphabetically within three focal groups from northernmost to southernmost latitudes. Cited references mostly represent the “taxonomic authority”. Outdated or incomplete published information was supplemented by field knowledge, herbarium studies and peer review. Herbarium codes followed the Index Herbariorum [25]: BM, Natural History Museum, London, England; BNRH, Buffelskloof Herbarium, Lydenburg, South Africa; BOL, Bolus Herbarium, Cape Town, South Africa; BR, Meise Botanic Garden Herbarium, Brussels, Belgium; E, Royal Botanic Garden Edinburgh Herbarium, Edinburgh, Scotland; J, C.E. Moss Herbarium, Johannesburg, South Africa; K, Royal Botanic Gardens Kew Herbarium, Richmond, England; M, Botanische Staatssammlung München, Munich, Germany; NBG & SAM, Compton Herbarium, Cape Town, South Africa; NH, KwaZulu-Natal Herbarium, Durban, South Africa; NU, Bews Herbarium, Pietermaritzburg, South Africa; PRE, National Herbarium, Pretoria, South Africa; PRU, H.G.W.J. Schweickerdt Herbarium, Pretoria, South Africa; TCD, Trinity College Herbarium, Dublin, Ireland; UDW, Ward Herbarium, Westville, South Africa.

| Taxon Name and Authority                                                                                                                                                                                                                                    | Family and Growth Form          | Distribution                                                                                                                                                           | Elevation Range (m a.s.l.) | Habitat, Vegetation Type(s) and Biome(s)                                                                                                           | Dominant Lithology                         | Flowering Phenology | Red List Status | Reference Voucher                     | Taxon Authority Reference(s)                     | EI  |
|-------------------------------------------------------------------------------------------------------------------------------------------------------------------------------------------------------------------------------------------------------------|---------------------------------|------------------------------------------------------------------------------------------------------------------------------------------------------------------------|----------------------------|----------------------------------------------------------------------------------------------------------------------------------------------------|--------------------------------------------|---------------------|-----------------|---------------------------------------|--------------------------------------------------|-----|
| <i>Group 1: “The Northern Group” — southern Mpumalanga (Ermelo, Amersfoort, Amsterdam, Piet Retief and Wakkerstroom) to northern, north-western, and north-central KZN (Groenvlei, Luneburg, Utrecht, Newcastle, Vryheid, Louwsburg, Ngome and Nkandla)</i> |                                 |                                                                                                                                                                        |                            |                                                                                                                                                    |                                            |                     |                 |                                       |                                                  |     |
| <i>Aloe dominella</i> Reynolds<br>[Taxon 01]                                                                                                                                                                                                                | Asphodelaceae<br>Succulent aloe | Vryheid district, northern KZN, through to Nkandla, Middelrus, Mooi River & Bergville districts in western KZN & Sterkfontein Dam on the KZN/eastern Free State border | 900–1700                   | Hilly areas, on steep, rocky slopes & rocky outcrops, in dry open grassland & grassy thornveld in a grassland–savanna transition (GB, GB–SB)       | Grows mostly in dolerite-derived soils     | June–October        | Near Threatened | IB Pole-<br><i>Evans</i> 37711<br>PRE | Craib [104];<br>Klopper et al. [105]             | 100 |
| <i>Aloe gerstneri</i> Reynolds<br>[Taxon 02]                                                                                                                                                                                                                | Asphodelaceae<br>Succulent aloe | Babanango & Nqutu districts, north-central KZN                                                                                                                         | 900–950                    | Dry rocky hill slopes & outcrops or along stream banks in grassland & grassy thornveld; Northern KZN Moist Grassland & KZN Highland Thornveld (GB) | Grows in quartzite & granite-derived soils | February–March      | Endangered      | GW Reynolds<br>2320 BOL               | Klopper et al. [105];<br>Van Wyk and Smith [106] | 100 |

| Taxon Name and Authority                                                   | Family and Growth Form          | Distribution                                                                                                                                                                                                           | Elevation Range (m a.s.l.) | Habitat, Vegetation Type(s) and Biome(s)                                                                              | Dominant Lithology                                 | Flowering Phenology    | Red List Status       | Reference Voucher              | Taxon Authority Reference(s)                 | EI  |
|----------------------------------------------------------------------------|---------------------------------|------------------------------------------------------------------------------------------------------------------------------------------------------------------------------------------------------------------------|----------------------------|-----------------------------------------------------------------------------------------------------------------------|----------------------------------------------------|------------------------|-----------------------|--------------------------------|----------------------------------------------|-----|
| <i>Aloe hlangapies</i> Groenew.<br>[Taxon 03]                              | Asphodelaceae<br>Succulent aloe | Southern Mpumalanga (Amsterdam, Volksrust, Wakkerstroom & Piet Retief districts) to northern KZN (Groenvlei, Paulpietersburg, Louwsburg, Vryheid & Ngome districts) & an outlying population in south-western Eswatini | 1200–2000                  | Rocky outcrops in sloping grassland, often near drainage lines and seeps (GB)                                         | Grows in dolerite-derived soils                    | October–early December | Vulnerable            | <i>GW Reynolds</i><br>2708 PRE | Craib [104]; Klopper et al. [105]            | 98  |
| <i>Aloe nicholsii</i> Gideon F.Sm. & N.R.Crouch<br>[Taxon 04]              | Asphodelaceae<br>Succulent aloe | Babanango, Eshowe & Nkandla districts, north-central KZN                                                                                                                                                               | 1200–1300                  | Open rocky grassland; Northern Zululand Sourveld (GB–SB)                                                              | Grows mostly in granite & gneiss-derived soils     | January–March          | Critically Endangered | <i>NR Crouch</i><br>1270 PRE   | Klopper et al. [105]; Smith and Crouch [107] | 100 |
| <i>Aloe reitzii</i> Reynolds var. <i>vernalis</i> D.S.Hardy<br>[Taxon 05]  | Asphodelaceae<br>Succulent aloe | Paulpietersburg & Vryheid districts, northern KZN                                                                                                                                                                      | 900–950                    | Steep rocky slopes in grassland; KZN Highland Thornveld (GB)                                                          | Grows mostly in well-drained granite-derived soils | August–September       | Vulnerable            | <i>DS Hardy</i><br>3589 PRE    | Klopper et al. [105]; Hardy and Reid [108]   | 100 |
| <i>Asparagus fractiflexus</i> (Oberm.) Fellingham & N.L.Mey.<br>[Taxon 06] | Asparagaceae<br>Shrub           | Southern Mpumalanga, between Carolina & Badplaas to Ermelo & Wakkerstroom districts                                                                                                                                    | 1500–1800                  | Rocky outcrops or mountain slopes in moist montane grassland; KaNgwane Montane & Wakkerstroom Montane Grasslands (GB) | Grows mostly in dolerite-derived soils             | November–February      | Endangered            | <i>HR Tolken</i><br>1116 PRE   | Obermeyer and Immelman [109]                 | 99  |
| <i>Aspidoglossum demissum</i> Kupicha<br>[Taxon 07]                        | Apocynaceae<br>Forb             | Southern Mpumalanga (Volksrust & Wakkerstroom districts) to Utrecht district, northern KZN                                                                                                                             | 1900–2200                  | Rock crevices on mountain summits & mountain slopes; Wakkerstroom Montane & Low                                       | Grows mostly in dolerite-derived soils             | December–January       | Vulnerable            | <i>SP Bester</i><br>12950 PRE  | Kupicha [110]                                | 100 |

| Taxon Name and Authority                                       | Family and Growth Form                      | Distribution                                                                                                              | Elevation Range (m a.s.l.) | Habitat, Vegetation Type(s) and Biome(s)                                                                                     | Dominant Lithology                                 | Flowering Phenology | Red List Status | Reference Voucher             | Taxon Authority Reference(s) | EI  |
|----------------------------------------------------------------|---------------------------------------------|---------------------------------------------------------------------------------------------------------------------------|----------------------------|------------------------------------------------------------------------------------------------------------------------------|----------------------------------------------------|---------------------|-----------------|-------------------------------|------------------------------|-----|
|                                                                |                                             |                                                                                                                           |                            | Escarpment Moist Grasslands (GB)                                                                                             |                                                    |                     |                 |                               |                              |     |
| <i>Aspidoglossum xanthosphaerum</i> Hilliard<br><br>[Taxon 08] | Apocynaceae<br><br>Forb                     | Southern Mpumalanga (Breyten, Ermelo, Volksrust & Wakkerstroom districts) southwards to northern KZN (Groenvlei district) | 1600–2000                  | Marshy areas, floodplains, or moist hillslopes in montane grassland; Wakkerstroom Montane & Eastern Highveld Grasslands (GB) | Grows mostly in dolerite-derived soils             | October–December    | Vulnerable      | OM Hilliard & BL Burt 18528 E | Hilliard and Burt [111]      | 100 |
| <i>Blepharis subglabra</i> Vollesen<br><br>[Taxon 09]          | Acanthaceae<br><br>Subshrub                 | Paulpietersburg & Louwsburg districts, northern KZN                                                                       | 1000–1100                  | Steep rocky slopes in grassland; Ithala Quartzite Sourveld (GB)                                                              | Grows mostly in quartzitic sandstone-derived soils | June                | Vulnerable      | LEW Codd 4316 BR              | Vollesen [112]               | 100 |
| <i>Bowkeria citrina</i> Thode<br><br>[Taxon 10]                | Stilbaceae<br><br>Large shrub or small tree | Southern Mpumalanga (Wakkerstroom & Luneburg districts) southwards to northern KZN (Groenvlei & Utrecht districts)        | 1400–1800                  | Stream banks, forest & cliff edges on cool slopes; Wakkerstroom Montane Grassland & Northern Afrotemperate Forest (GB–FB)    | Grows mostly in dolerite & sandstone-derived soils | January–March       | Rare            | TJ Edwards 3444 NU            | Boon [32]                    | 100 |
| <i>Cephalaria foliosa</i> Compton<br><br>[Taxon 11]            | Dipsacaceae<br><br>Forb                     | Vryheid district, northern KZN, to western margins of Eswatini                                                            | 1000–1500                  | Wetlands & stream edges in moist montane grassland; KaNgwane Montane & Paulpietersburg Moist Grasslands (GB)                 | Grows in damp clay soils                           | March–May           | Vulnerable      | RH Compton 42056 PRE          | Compton [113]                | 97  |
| <i>Ceropegia antennifera</i> Schltr.<br><br>[Taxon 12]         | Apocynaceae<br><br>Forb                     | Newcastle district, north-western KZN                                                                                     | 1200–1300                  | Montane grassland (GB)                                                                                                       | Grows in dolerite-derived soils                    | October             | Extinct         | R Schlechter 3426 BOL         | Scott-Shaw [23]              | 100 |

| Taxon Name and Authority                                 | Family and Growth Form     | Distribution                                                                                                                                             | Elevation Range (m a.s.l.) | Habitat, Vegetation Type(s) and Biome(s)                                                                                  | Dominant Lithology                             | Flowering Phenology | Red List Status       | Reference Voucher                         | Taxon Authority Reference(s) | EI  |
|----------------------------------------------------------|----------------------------|----------------------------------------------------------------------------------------------------------------------------------------------------------|----------------------------|---------------------------------------------------------------------------------------------------------------------------|------------------------------------------------|---------------------|-----------------------|-------------------------------------------|------------------------------|-----|
| <i>Ceropegia craibii</i> J.Victor<br>[Taxon 13]          | Apocynaceae<br>Forb        | Vryheid & Louwsburg districts (Bivane River catchment), northern KZN                                                                                     | 800–1000                   | Short, open grassland on sloping ridges; Ithala Quartzite Sourveld (GB)                                                   | Grows in shallow shale-derived soils           | December–February   | Vulnerable            | <i>G Condy 119 PRE</i>                    | Victor [114]; Craib [115]    | 100 |
| <i>Ceropegia heidukiae</i> D.Styles & Meve<br>[Taxon 14] | Apocynaceae<br>Forb        | Ngome Mtn, northern KZN                                                                                                                                  | 1000                       | Steepish, north-facing hillsides in mistbelt grassland; Northern Zululand Mistbelt Grassland (GB)                         | Grows in shallow dolerite-derived soils        | December            | Critically Endangered | <i>DGA Styles &amp; A Heiduk 5884 NU</i>  | Styles and Meve [116]        | 100 |
| <i>Ceropegia ngomensis</i> R.A.Dyer<br>[Taxon 15]        | Apocynaceae<br>Forb        | Ngome Mtn, northern KZN                                                                                                                                  | 1100–1250                  | Seepage edges of rock sheets in mistbelt grassland; Northern Zululand Mistbelt Grassland (GB)                             | Grows mostly in shallow dolerite-derived soils | December            | Endangered            | <i>OM Hilliard &amp; BL Burt 8441 PRE</i> | Dyer [117]                   | 100 |
| <i>Ceropegia remota</i> (R.A.Dyer) Bruyns<br>[Taxon 16]  | Apocynaceae<br>Forb        | Southern Mpumalanga (Wakkerstroom district) to northern KZN (Paulpietersburg & Utrecht districts)                                                        | 1600–2250                  | Rocky outcrops & plateaus in montane grassland; Wakkerstroom Montane Grassland (GB)                                       | Grows in shallow, shale-derived soils          | October             | Rare                  | <i>NJ Devenish 914 PRE</i>                | Dyer [118]                   | 100 |
| <i>Ceropegia stylesii</i> Heiduk<br>[Taxon 17]           | Apocynaceae<br>Forb        | Ngome Mtn, northern KZN                                                                                                                                  | 820–1300                   | Sloping, north-facing rocky hillsides; Northern Zululand Mistbelt Grassland (GB)                                          | Grows mostly in shallow dolerite-derived soils | February            | Critically Endangered | <i>DGA Styles &amp; A Heiduk 5870 NU</i>  | Heiduk [119]                 | 100 |
| <i>Cissus cussonioides</i> Schinz<br>[Taxon 18]          | Vitaceae<br>Spreading forb | Amajuba, Bergville, Dannhauser, Elandslaagte, Glencoe, Helpmekaar, Ladysmith, Newcastle, Nqutu, Weenen, Winterton & Utrecht districts, north-western KZN | 1000–1900                  | On rocky hill slopes & hill tops in grassland; Northern KZN Moist & Income Sandy Grasslands & KZN Highland Thornveld (GB) | Grows mostly in dolerite-derived soils         | October–January     | Least Concern         | <i>JM Wood 3593 K</i>                     | Pooley [31]                  | 100 |

| Taxon Name and Authority                                                 | Family and Growth Form         | Distribution                                                                                                                                         | Elevation Range (m a.s.l.) | Habitat, Vegetation Type(s) and Biome(s)                                                                                                                                                 | Dominant Lithology                                  | Flowering Phenology | Red List Status                     | Reference Voucher                            | Taxon Authority Reference(s)                    | EI  |
|--------------------------------------------------------------------------|--------------------------------|------------------------------------------------------------------------------------------------------------------------------------------------------|----------------------------|------------------------------------------------------------------------------------------------------------------------------------------------------------------------------------------|-----------------------------------------------------|---------------------|-------------------------------------|----------------------------------------------|-------------------------------------------------|-----|
| <i>Cyrtanthus brachysiphon</i><br>Hilliard & B.L.Burt<br>[Taxon 19]      | Amaryllidaceae<br><br>Geophyte | Ngotshe Mtn/Louwsburg Plateau, northern KZN                                                                                                          | 1100–1300                  | Moist ledges at the base of cliffs near waterfalls & semi-shaded wooded watercourses (GB–SB)                                                                                             | Grows on sandstone cliffs                           | December–April      | Endangered                          | <i>AB Cunningham</i><br>s.n. NU              | Hilliard and Burt [120];<br>Duncan et al. [121] | 100 |
| <i>Cyrtanthus nutans</i><br>R.A.Dyer<br>[Taxon 20]                       | Amaryllidaceae<br><br>Geophyte | Dundee–Helpmekaar (Vant’s Drift) districts, north-western KZN, with outliers in Barberton & Eswatini                                                 | 1000–1450                  | Margins of wetlands near rocks & short grassland on hills; Income Sandy, Northern KZN Moist & Kangwane Montane Grasslands (GB)                                                           | Grows mostly in dolerite-derived soils              | August–October      | Vulnerable                          | <i>LEW Codd</i><br>7041 PRE                  | Duncan et al. [121]; Ruddle et al. [122]        | 98  |
| <i>Danthoniopsis scopulorum</i><br>(J.B.Phipps) J.B.Phipps<br>[Taxon 21] | Poaceae<br><br>Graminoid       | Ngotshe, Ithala Game Reserve, Bivane Dam & Coronation Village, Louwsburg district, northern KZN                                                      | 700–1100                   | Cliffs and steep, rocky habitats in open savanna & wooded grasslands (GB–SB)                                                                                                             | Grows on sandstone cliffs & sandstone-derived soils | June–October        | Data Deficient – Taxon. Problematic | <i>LEW Codd</i><br>4314 PRE                  | Scott-Shaw [23]                                 | 100 |
| <i>Dierama erectum</i> Hilliard<br>[Taxon 22]                            | Iridaceae<br><br>Geophyte      | Mpumalanga/KZN border in the Luneburg district, to Utrecht & Ngome districts, northern KZN                                                           | 1000–1900                  | Moist grassy areas along the edges of streams & hill slopes in mistbelt grassland (GB)                                                                                                   | Grows mostly in moist dolerite-derived soils        | January–March       | Endangered                          | <i>OM Hilliard &amp; BL Burt</i><br>9901 NU  | Hilliard and Burt [123]                         | 100 |
| <i>Dracosciadium itala</i><br>Hilliard & B.L.Burt<br>[Taxon 23]          | Apiaceae<br><br>Forb           | Southern Mpumalanga (Wakkerstroom district) to northern KZN (Vryheid, Louwsburg/Ngotshe Mtn, Utrecht & Ngome Mtn) as far south as Babanango district | 1100–1600                  | Rocky outcrops & hilltops in mistbelt & montane grasslands; Northern Zululand Mistbelt, Northern Zululand Sourveld, Paulpietersburg Moist & Wakkerstroom Montane Grasslands (GB & GB–SB) | Grows in dolerite-derived soils                     | December–February   | Vulnerable                          | <i>OM Hilliard &amp; BL Burt</i><br>17732 NU | Hilliard and Burt [120]                         | 100 |

| Taxon Name and Authority                                         | Family and Growth Form             | Distribution                                                                                                         | Elevation Range (m a.s.l.) | Habitat, Vegetation Type(s) and Biome(s)                                                       | Dominant Lithology                              | Flowering Phenology | Red List Status       | Reference Voucher                                     | Taxon Authority Reference(s)                                 | EI  |
|------------------------------------------------------------------|------------------------------------|----------------------------------------------------------------------------------------------------------------------|----------------------------|------------------------------------------------------------------------------------------------|-------------------------------------------------|---------------------|-----------------------|-------------------------------------------------------|--------------------------------------------------------------|-----|
| <i>Encephalartos aemulans</i> Vorster<br>[Taxon 24]              | Zamiaceae<br><br>Cycad             | Hlomohlomo district, northern KZN                                                                                    | 560–1100                   | Mostly south-facing sandstone cliffs & steep slopes; Northern Zululand Sourveld (SB)           | Grows mostly in shallow sandstone-derived soils | April–early July    | Critically Endangered | <i>C Carbutt &amp; IM Johnson</i><br>10 of 2023<br>NU | Vorster [124]                                                | 100 |
| <i>Eugenia pusilla</i> N.E.Br.<br>[Taxon 25]                     | Myrtaceae<br><br>Geoxylic subshrub | Amsterdam & Ermelo districts, southern Mpumalanga                                                                    | 1100–1250                  | Kangwane Montane Grassland (GB)                                                                | Grows in dolerite-derived soil                  | November–December   | Extinct               | <i>MO Forbes</i><br>6748 K                            | Brown [125];<br>Van Wyk [126]                                | 100 |
| <i>Gladiolus scabridus</i> Goldblatt & J.C.Manning<br>[Taxon 26] | Iridaceae<br><br>Geophyte          | Wakkerstroom, southern Mpumalanga, to Louwsburg district, (Bivane Dam) & Babanango, northern KZN & southern Eswatini | 1000–2000                  | Well-drained rocky hillsides in open woodland & grassland (GB–SB)                              | Grows mostly in shallow quartzite-derived soils | December–January    | Least Concern         | <i>NHG Jacobsen</i><br>62536 PRE                      | Saunders and<br>Saunders [127]                               | 100 |
| <i>Helichrysum ingomense</i> Hilliard<br>[Taxon 27]              | Asteraceae<br><br>Forb             | Ngome Mtn, Ngome district, northern KZN                                                                              | 1100–1300                  | Edges of dolerite rock sheets in mistbelt grassland; Northern Zululand Mistbelt Grassland (GB) | Grows mostly in shallow dolerite-derived soils  | January             | Endangered            | <i>OM Hilliard &amp; BL Burtt</i><br>5925 K           | Hilliard [128]                                               | 100 |
| <i>Holothrix majubensis</i> C.& R.H.Archer<br>[Taxon 28]         | Orchidaceae<br><br>Forb            | Amajuba Mtn, north-western KZN                                                                                       | 2000–2225                  | Cracks in vertical sandstone cliffs in montane grassland (GB)                                  | Grows in thin sandstone-derived soils           | December–January    | Rare                  | <i>C Archer &amp; RH Archer</i><br>2063 PRE           | Archer and<br>Archer [129];<br>Johnson and<br>Bytebier [130] | 100 |
| <i>Jatropha natalensis</i> Müll.Arg.<br>[Taxon 29]               | Euphorbiaceae<br><br>Forb          | Nongoma district, northern KZN, to Colenso, Ladysmith, Masinga, Weenen & Tugela Ferry districts, north-central KZN   | 950–1200                   | Grassy valley tickets; KZN Highland Thornveld (GB)                                             | Grows in shale-derived soils                    | October–December    | Least Concern         | <i>JM Wood</i><br>4243 NH                             | Scott-Shaw<br>[23]                                           | 99  |
| <i>Kniphofia albescens</i> Codd<br>[Taxon 30]                    | Asphodelaceae<br><br>Forb          | Piet Retief & Ermelo districts, southern Mpumalanga, to Utrecht district, northern KZN. Extends marginally to        | 1500–2000                  | Dense grassland on mountain slopes & marshy places (GB)                                        | Grows mostly in dolerite-derived soils          | January–March       | Least Concern         | <i>LEW Codd</i><br>3243 PRE                           | Codd [131]                                                   | 97  |



| Taxon Name and Authority                                                 | Family and Growth Form         | Distribution                                                                                                                                                         | Elevation Range (m a.s.l.) | Habitat, Vegetation Type(s) and Biome(s)                                                                                                     | Dominant Lithology                             | Flowering Phenology | Red List Status                          | Reference Voucher                        | Taxon Authority Reference(s)       | EI  |
|--------------------------------------------------------------------------|--------------------------------|----------------------------------------------------------------------------------------------------------------------------------------------------------------------|----------------------------|----------------------------------------------------------------------------------------------------------------------------------------------|------------------------------------------------|---------------------|------------------------------------------|------------------------------------------|------------------------------------|-----|
| <i>Lotononis pottiae</i> Burt<br>Davy<br>[Taxon 37]                      | Fabaceae<br><br>Shrub          | Mavieriestad (Ermelo district) to Volksrust & Piet Retief districts, southern Mpumalanga, to Utrecht & Fort Mistake districts, north-western KZN & Oliviershoek Pass | 1500–1900                  | Hill slopes in montane grassland (GB)                                                                                                        | Grows mostly in sandstone-derived soils        | July–October        | Least Concern                            | <i>R Pott</i> 5071 K                     | Van Wyk [132]                      | 99  |
| <i>Melanospermum italae</i> Hilliard<br>[Taxon 38]                       | Scrophulariaceae<br><br>Forb   | Piet Retief district, southern Mpumalanga, to Louwsburg district (Ngotshe Mtn), northern KZN & western Eswatini                                                      | 1200–1550                  | Rocky outcrops & rock sheets in mistbelt grassland; Ithala Quartzite Sourveld, KaNgwane Montane & Northern Zululand Mistbelt Grasslands (GB) | Grows mostly in dolerite-derived soils         | November–April      | Vulnerable                               | <i>OM Hilliard &amp; BL Burt</i> 10025 E | Scott-Shaw [23]                    | 98  |
| <i>Moraea graminicola</i> Oberm. subsp. <i>graminicola</i><br>[Taxon 39] | Iridaceae<br><br>Geophyte      | Ngome, northern KZN, to the KZN Midlands (Bulwer, Impendle, Mooi River, Nottingham Road & Hilton districts) & Drakensberg foothills near Underberg                   | 900–1500                   | Moist slopes & flats in open grassland (GB)                                                                                                  | Grows mostly in dolerite-derived soils         | August–November     | Near Threatened                          | <i>EE Galpin</i> 9442 PRE                | Goldblatt [133]                    | 100 |
| <i>Nerine platypetala</i> McNeil<br>[Taxon 40]                           | Amaryllidaceae<br><br>Geophyte | Volksrust & Wakkerstroom districts, Southern Mpumalanga, to Groenvlei district, northern KZN                                                                         | 1500–2200                  | Margins of perennial wetlands & riverbanks in montane grassland; Wakkerstroom Montane Grassland (GB)                                         | Grows in heavy mud that remains moist all year | Late January–March  | Vulnerable                               | <i>G McNeil</i> 17 NU                    | Duncan et al. [121]; McNeil [134]; | 100 |
| <i>Pachycarpus rostratus</i> N.E.Br.<br>[Taxon 41]                       | Apocynaceae<br><br>Forb        | Nkandla district, north-central KZN                                                                                                                                  | Unknown                    | Open moist grassland; Midlands Mistbelt Grassland (GB)                                                                                       | Unknown (probably sandstone-derived soils)     | Unknown             | Critically Endangered (Possibly Extinct) | <i>Haygarth sub Wood</i> 7543 NH         | Smith [135]                        | 100 |



| Taxon Name and Authority                                              | Family and Growth Form     | Distribution                                                                                                                                             | Elevation Range (m a.s.l.) | Habitat, Vegetation Type(s) and Biome(s)                                                                                      | Dominant Lithology                                 | Flowering Phenology | Red List Status | Reference Voucher                               | Taxon Authority Reference(s)             | EI  |
|-----------------------------------------------------------------------|----------------------------|----------------------------------------------------------------------------------------------------------------------------------------------------------|----------------------------|-------------------------------------------------------------------------------------------------------------------------------|----------------------------------------------------|---------------------|-----------------|-------------------------------------------------|------------------------------------------|-----|
| <i>Periglossum podoptyches</i><br>Nicholas & Bester<br><br>[Taxon 42] | Apocynaceae<br><br>Forb    | Dannhauser & Utrecht districts, north-western KZN                                                                                                        | 1000–1200                  | Dry grasslands of level plains & floodplains; Northern KZN Moist & Income Sandy Grasslands (GB)                               | Grows in rocky, well drained loamy soils           | November–January    | Vulnerable      | <i>SP Bester</i><br>10585 PRE                   | Bester and Nicholas [136]                | 100 |
| <i>Rhynchosia foliosa</i><br>Markötter<br><br>[Taxon 43]              | Fabaceae<br><br>Forb       | Oliviershoek Pass, low KZN Drakensberg escarpment, north-western KZN                                                                                     | Unknown                    | Montane grassland (GB)                                                                                                        | Unknown                                            | Unknown             | Data Deficient  | Untraceable                                     | Markötter [137]                          | 100 |
| <i>Schizochilus gerrardii</i><br>(Rchb.f.) Bolus<br><br>[Taxon 44]    | Orchidaceae<br><br>Forb    | Ngome Mtn & Louwsburg Plateau (Ngotshe Mtn) southwards to Ceza, northern KZN                                                                             | 1050–1450                  | Amongst rock outcrops & margins of seepages in shallow soils of mistbelt grassland; Northern Zululand Mistbelt Grassland (GB) | Grows mostly in dolerite & sandstone-derived soils | December–January    | Endangered      | <i>WT Gerrard</i><br>1542 TCD                   | Johnson and Bytebier [130]; Linder [138] | 100 |
| <i>Searsia dracomontana</i><br>(Moffett) Moffett<br><br>[Taxon 45]    | Anacardiaceae<br><br>Shrub | Charlestown & Wakkerstroom districts, Southern Mpumalanga, to Van Reenen’s Pass on the Free State/KZN border & Utrecht & Vryheid districts, northern KZN | 1500–2200                  | Rocky outcrops in montane grassland & scrubby edges in forest ecotone (GB)                                                    | Grows mostly in dolerite-derived soils             | October–January     | Near Threatened | <i>JE Burrows &amp; SM Burrows</i><br>7988 BNRH | Boon [32]; Moffett [139]                 | 100 |
| <i>Searsia harveyi</i> (Moffett) Moffett<br><br>[Taxon 46]            | Anacardiaceae<br><br>Shrub | Luneburg district, to Mabaso (near Utrecht), Ithala Game Reserve & Louwsburg district, northern KZN, with outlying records from western Eswatini         | 800–1600                   | Rocky outcrops in grassland; Northern Zululand Mistbelt Grassland (GB)                                                        | Grows in quartzitic sandstone-derived soils        | December–February   | Near Threatened | <i>RO Moffett</i><br>3043 K                     | Boon [32]; Moffett [139]                 | 97  |

| Taxon Name and Authority                                      | Family and Growth Form            | Distribution                                                                                                                                           | Elevation Range (m a.s.l.) | Habitat, Vegetation Type(s) and Biome(s)                                                                             | Dominant Lithology                          | Flowering Phenology | Red List Status     | Reference Voucher               | Taxon Authority Reference(s)    | EI  |
|---------------------------------------------------------------|-----------------------------------|--------------------------------------------------------------------------------------------------------------------------------------------------------|----------------------------|----------------------------------------------------------------------------------------------------------------------|---------------------------------------------|---------------------|---------------------|---------------------------------|---------------------------------|-----|
| <i>Selago barbula</i> Harv. ex Rolfe<br>[Taxon 47]            | Scrophulariaceae<br>Forb          | Ngome, Ngoje & Louwsburg districts (Ithala Game Reserve), northern KZN                                                                                 | 1100–1400                  | Rocky outcrops in open grassland; Northern Zululand Mistbelt Grassland (GB)                                          | Grows in dolerite & sandstone-derived soils | January–April       | Least Concern       | WT Gerrard 1241 K               | Scott-Shaw [23]; Hilliard [140] | 100 |
| <i>Selago longicalyx</i> Hilliard<br>[Taxon 48]               | Scrophulariaceae<br>Forb          | Wakkerstroom district, southern Mpumalanga, to Amajuba, Ncandu, Ngome, Utrecht & Vryheid districts, northern & north-western KZN                       | 1100–2000                  | Rocky grassland near forest margins; Northern Zululand & Wakkerstroom Montane Grasslands (GB)                        | Grows mostly in dolerite-derived soils      | January–May         | Least Concern       | OM Hilliard & BL Burtt 9841 PRE | Scott-Shaw [23]; Hilliard [140] | 100 |
| <i>Selago longipedicellata</i> Rolfe<br>[Taxon 49]            | Scrophulariaceae<br>Forb–subshrub | Babanango & Nkandla districts, north-central KZN, to Bryne (Richmond district) in the KZN Midlands, with an outlier near Elliot, Eastern Cape Midlands | 900–1800                   | Hilltops & hillslopes in grassland (GB)                                                                              | Grows in dolerite & sandstone-derived soils | November–April      | Least Concern       | JM Wood 3967 K                  | Scott-Shaw [23]; Hilliard [140] | 99  |
| <i>Senecio villifructus</i> Hilliard<br>[Taxon 50]            | Asteraceae<br>Forb                | Ngotshe Massif (Louwsburg Plateau), Louwsburg district, northern KZN                                                                                   | 1000–1300                  | Grassy slopes & rocky outcrops in mistbelt grassland on mountain plateaus; Northern Zululand Mistbelt Grassland (GB) | Grows mostly in dolerite-derived soils      | December–January    | Endangered          | OM Hilliard & BL Burtt 8530 NU  | Scott-Shaw [23]                 | 100 |
| <i>Stenostelma urceolatum</i> Bester & Nicholas<br>[Taxon 51] | Apocynaceae<br>Forb               | Newcastle & Vryheid districts, northern KZN                                                                                                            | 1050–1150                  | Undulating rocky grasslands (hill slopes & depressions), Income Sandy Grassland (GB)                                 | Grows mostly in dolerite-derived soils      | February            | Least Concern; Rare | SP Bester 6541 PRE              | Bester and Nicholas [141]       | 100 |

| Taxon Name and Authority                                             | Family and Growth Form                      | Distribution                                                                                                                                     | Elevation Range (m a.s.l.) | Habitat, Vegetation Type(s) and Biome(s)                                                                   | Dominant Lithology                                      | Flowering Phenology | Red List Status | Reference Voucher  | Taxon Authority Reference(s)              | EI  |
|----------------------------------------------------------------------|---------------------------------------------|--------------------------------------------------------------------------------------------------------------------------------------------------|----------------------------|------------------------------------------------------------------------------------------------------------|---------------------------------------------------------|---------------------|-----------------|--------------------|-------------------------------------------|-----|
| <i>Streptocarpus candidus</i><br>Hilliard<br>[Taxon 52]              | Gesneriaceae<br>Epiphytic herb (lithophyte) | Ngotshe & Vryheid districts, mainly at Ngome, Ceza & Nhlazatshe Mtns, northern KZN, possibly an outlying record from Limpopo                     | 950–1400                   | Cliff faces & damp rocky banks along streams in Mistbelt Forest associated with isolated mountaintops (FB) | Grows mostly on dolerite-derived cliffs & earth banks   | November–February   | Least Concern   | OM Hilliard 863 NU | Scott-Shaw [23]; Hilliard and Burtt [142] | 99  |
| <i>Streptocarpus cooperi</i><br>C.B.Clarke<br>[Taxon 53]             | Gesneriaceae<br>Epiphytic herb (lithophyte) | Qudeni, Van Reenen, Dundee & Biggarsberg districts, northern and north-central KZN, with an outlier at Krantzklloof, coastal hinterland          | 600–1500                   | Steep earth & rock banks in forest, often near streams (FB)                                                | Grows mostly on dolerite & sandstone-derived substrates | January–April       | Least Concern   | T Cooper 1033 K    | Hilliard and Burtt [142]                  | 99  |
| <i>Streptocarpus daviesii</i><br>N.E.Br. ex C.B.Clarke<br>[Taxon 54] | Gesneriaceae<br>Epiphytic herb              | Ngome, Nkandla, Qudeni & Vryheid districts, northern & north-central KZN, southwards to between Mapumulo & Kranskop, with an outlier in Eswatini | 1100–1850                  | Rock faces & tree trunks in forest (FB)                                                                    | Grows mostly on dolerite & sandstone-derived substrates | December–March      | Least Concern   | GW Davies 55 K     | Hilliard and Burtt [142]                  | 99  |
| <i>Streptocarpus kunhardtii</i><br>T.J.Edwards<br>[Taxon 55]         | Gesneriaceae<br>Epiphytic herb (lithophyte) | Ithala Game Reserve, Louwsburg district, northern KZN                                                                                            | 600–750                    | South-facing cliffs & kloofs in deep shade near streams & waterfalls (SB)                                  | Grows on sandstone cliffs (Mozaan Group quartz)         | December–January    | Least Concern   | C Carbutt 35 NU    | Edwards [143]                             | 100 |
| <i>Syncolostemon aurulentus</i><br>Ngwenya<br>[Taxon 56]             | Lamiaceae<br>Forb–subshrub                  | Escarpment above Utrecht, Amajuba district, north-western KZN                                                                                    | 1650–1900                  | Rocky grassland & scrub; Wakkerstroom Montane Grassland (GB)                                               | Grows in well-drained, moist sandstone-derived soils    | December–January    | Rare            | AM Ngwenya 4326 NH | Ngwenya [144]                             | 100 |
| <i>Syncolostemon gerrardii</i><br>(N.E.Br.) D.F.Otieno<br>[Taxon 57] | Lamiaceae<br>Shrub                          | Piet Retief district, southern Mpumalanga, to Louwsburg, Ngome & Nongoma districts, northern KZN                                                 | 1000–1300                  | Rocky grassland in open woodland (SB)                                                                      | Grows in sandstone-derived soils                        | November–February   | Least Concern   | WT Gerrard 1239 K  | Codd [145]; Otieno et al. [146]           | 100 |

| Taxon Name and Authority                                                                                                   | Family and Growth Form           | Distribution                                                                                                                                                                                                                  | Elevation Range (m a.s.l.) | Habitat, Vegetation Type(s) and Biome(s)                                                                                                   | Dominant Lithology                                             | Flowering Phenology | Red List Status | Reference Voucher                               | Taxon Authority Reference(s) | EI  |
|----------------------------------------------------------------------------------------------------------------------------|----------------------------------|-------------------------------------------------------------------------------------------------------------------------------------------------------------------------------------------------------------------------------|----------------------------|--------------------------------------------------------------------------------------------------------------------------------------------|----------------------------------------------------------------|---------------------|-----------------|-------------------------------------------------|------------------------------|-----|
| <i>Thorncroftia greenii</i><br>Changwe & K.Balkwill<br><br>[Taxon 58]                                                      | Lamiaceae<br><br>Forb–shrub      | Louwsburg (Ngotshe) district, northern KZN                                                                                                                                                                                    | 1000–1200                  | Fissures & cracks of rock outcrops in open woodland; Ithala Quartzite Sourveld (GB–SB)                                                     | Grows in quartzitic sandstone-derived soils                    | March–April         | Endangered      | <i>Balkwill, Changwe &amp; Green 12202</i><br>J | Balkwill et al. [147]        | 100 |
| <i>Xerophyta vallispongolana</i><br>J.E.Burrows, S.M.Burrows & Behnke<br><br>[Taxon 59]                                    | Velloziaceae<br><br>Shrub        | Comondale in the Piet Retief district, southern Mpumalanga, to the upper Pongola River Valley, northern KZN                                                                                                                   | 1000–1200                  | Rocky outcrops in grassland; Paulpietersburg Moist Grassland & Swaziland Sour Bushveld (GB–SB)                                             | Grows mostly in sandstone-derived soils                        | November–December   | Vulnerable      | <i>JE Burrows &amp; SM Burrows 6586</i> BNRH    | Behnke et al. [148]          | 100 |
| <i>Zantedeschia valida</i><br>(Letty) Y.Singh<br><br>[Taxon 60]                                                            | Araceae<br><br>Tuberous geophyte | Ladysmith & Dundee districts (Biggarsberg & Elandslaagte), north-western KZN                                                                                                                                                  | 1100–1300                  | Rocky outcrops, streambanks & wetlands; Northern KZN Moist Grassland (GB)                                                                  | Grows mostly in dolerite-derived soils                         | November–March      | Vulnerable      | <i>CL Letty 492</i> PRE                         | Singh et al. [149]           | 100 |
| <i>Group 2: “The Central Group” – Predominantly KZN Midlands, occasionally with outliers to the north and south in KZN</i> |                                  |                                                                                                                                                                                                                               |                            |                                                                                                                                            |                                                                |                     |                 |                                                 |                              |     |
| <i>Acalypha entumenica</i><br>Prain<br><br>[Taxon 61]                                                                      | Euphorbiaceae<br><br>Forb        | Entumeni, Nkandla & Qudeni districts, central KZN                                                                                                                                                                             | 850–1600                   | Mistbelt & Ngongoni grasslands (GB)                                                                                                        | Grows mostly in dolerite-derived soils                         | November–December   | Endangered      | <i>J Medley-Wood s.n.</i><br>NH                 | Scott-Shaw [23]              | 100 |
| <i>Afroligusticum wilmsianum</i> (H.Wolff)<br>P.J.D.Winter<br><br>[Taxon 62]                                               | Apiaceae<br><br>Forb             | Groenvlei district, southern Mpumalanga, to Utrecht district in northern-western KZN & Ngome in northern KZN to Noodsberg & New Hanover districts, KZN Midlands & south to Ixopo, Umzimkulu & Kokstad districts, southern KZN | 700–1950                   | Moist grasslands on hill slopes & scrubby edges of streams; Wakkerstroom Montane, Moist Coast Hinterland & East Griqualand Grasslands (GB) | Grows on sandstone & shale-derived soils (& possibly dolerite) | November–April      | Vulnerable      | <i>AM Ngwenya 3560</i> NH                       | Winter et al. [150]          | 99  |

| Taxon Name and Authority                                          | Family and Growth Form           | Distribution                                                                                                                                                                                   | Elevation Range (m a.s.l.) | Habitat, Vegetation Type(s) and Biome(s)                                                                                                     | Dominant Lithology                       | Flowering Phenology   | Red List Status | Reference Voucher              | Taxon Authority Reference(s)                    | EI  |
|-------------------------------------------------------------------|----------------------------------|------------------------------------------------------------------------------------------------------------------------------------------------------------------------------------------------|----------------------------|----------------------------------------------------------------------------------------------------------------------------------------------|------------------------------------------|-----------------------|-----------------|--------------------------------|-------------------------------------------------|-----|
| <i>Aloe inconspicua</i> Plowes<br>[Taxon 63]                      | Asphodelaceae<br>Succulent aloes | Bushman’s River valley, between Estcourt & Weenen, Estcourt district, central KZN                                                                                                              | 1000–1250                  | Short dry grass on gently sloping hills in grassland-thornveld (valley bushveld) transition; Thukela Thornveld (GB–SB)                       | Grows in shale & sandstone-derived soils | Late October–November | Endangered      | <i>DCH Plowes 7079</i> PRE     | Craib [104]; Klopper et al. [105]; Plowes [151] | 100 |
| <i>Aloe mudenensis</i> Reynolds<br>[Taxon 64]                     | Asphodelaceae<br>Succulent aloes | Tugela River Valley (Kranskop district) & the Bushmans River Valley (Estcourt district) to the Umgeni Valley (Wartburg district) & Karkloof Valley, central KZN Midlands. Outliers in Eswatini | 750–1100                   | Open valley bushveld & thornveld in arid river valleys; KZN Hinterland Thornveld, Thukela Thornveld, Thukela Valley Bushveld (SB)            | Grows mostly in shale-derived soils      | June–August           | Least Concern   | <i>GW Reynolds 2029</i> K      | Klopper et al. [105]; Reynolds [152]            | 98  |
| <i>Aloe neilcrouchii</i> R.R.Klopper & Gideon F.Sm.<br>[Taxon 65] | Asphodelaceae<br>Succulent aloes | Karkloof (Mbona & Mt. Gilboa NRs), Blinkwater, Greytown & New Hanover districts, KZN Midlands                                                                                                  | 900–1700                   | SE-facing slopes of rocky, hilly grassland; Drakensberg Foothill Moist, Midlands Mistbelt & Mooi River Highland Grasslands (GB)              | Grows mostly in dolerite-derived soils   | December–January      | Endangered      | <i>C Carbutt 16 of 2021</i> NU | Klopper et al. [105]; Klopper and Smith [153]   | 100 |
| <i>Aloe prinslooii</i> I.Verd. & D.S.Hardy<br>[Taxon 66]          | Asphodelaceae<br>Succulent aloes | Colenso, Muden & Ladysmith districts in the Tugela River Basin, central KZN Midlands                                                                                                           | 800–1500                   | Dense grass understorey of open woodland & sometimes open rocky outcrops; Thukela Valley Bushveld & KwaZulu-Natal Highland Thornveld (GB–SB) | Grows mostly in thin shale-derived soils | June–October          | Endangered      | <i>DS Hardy 1908</i> K         | Klopper et al. [105]                            | 100 |

| Taxon Name and Authority                                        | Family and Growth Form          | Distribution                                                                                                                                                                                                   | Elevation Range (m a.s.l.) | Habitat, Vegetation Type(s) and Biome(s)                                                                                                     | Dominant Lithology                                             | Flowering Phenology | Red List Status | Reference Voucher              | Taxon Authority Reference(s)                  | EI  |
|-----------------------------------------------------------------|---------------------------------|----------------------------------------------------------------------------------------------------------------------------------------------------------------------------------------------------------------|----------------------------|----------------------------------------------------------------------------------------------------------------------------------------------|----------------------------------------------------------------|---------------------|-----------------|--------------------------------|-----------------------------------------------|-----|
| <i>Aloe pruinosa</i> Reynolds<br>[Taxon 67]                     | Asphodelaceae<br>Succulent aloe | KZN Midlands, in the Pietermaritzburg district (Bisley Valley Nature Reserve) & Ashburton/Lower Mpushini Valley northwards to Mapumulo & the Tugela River Basin near Hillside                                  | 650–750                    | Grows in the shade of bush clumps in closed woodland (GB)                                                                                    | Grows mostly in heavy loam shale-derived soils                 | February–March      | Vulnerable      | <i>B Nicholson 38105</i> PRE   | Klopper et al. [105]                          | 100 |
| <i>Aloe saundersiae</i> (Reynolds) Reynolds<br>[Taxon 68]       | Asphodelaceae<br>Succulent aloe | Nkandla Mtn, with a small population introduced to the rocky grasslands of the adjacent Nkandla Forest Reserve, to Melmoth southwards to Greytown, Noodsberg & Wartburg districts, north-central & central KZN | 1000–1300                  | South-facing slopes & rocky outcrops in short rocky grassland; KZN Sandstone Sourveld & Midlands Mistbelt Grassland (GB)                     | Grows in quartzitic sandstone-derived soils of the Natal Group | February–March      | Endangered      | <i>C Carbutt 02 of 2017</i> NU | Craib [104]; Klopper et al. [105]             | 100 |
| <i>Aloe spectabilis</i> Reynolds<br>[Taxon 69]                  | Asphodelaceae<br>Succulent aloe | Bushman’s, Mooi & Tugela River valleys, central & north-western KZN                                                                                                                                            | 750–1400                   | Rocky places & open hills in grassland & savanna; Thukela Thornveld, Thukela Valley Bushveld, KZN Highland Thornveld (GB–SB)                 | Grows mostly in shale & sandstone-derived soils                | June–August         | Least Concern   | <i>GW Reynolds 2033</i> PRE    | Klopper et al. [105]; Klopper and Smith [154] | 100 |
| <i>Aloe vanrooyenii</i> Gideon F.Sm. & N.R.Crouch<br>[Taxon 70] | Asphodelaceae<br>Succulent aloe | Dundee, Helpmekaar, Colenso, Weenen, Mudén & Middelrus districts, north-western & central KZN                                                                                                                  | 1000–1250                  | Hilly areas in open grassland & thornveld savanna; Income Sandy Grassland, KwaZulu-Natal Highland Thornveld, Thukela Valley Bushveld (GB–SB) | Grows mostly in shale & sandstone-derived soils                | October–November    | Least Concern   | <i>GW Reynolds 339</i> PRE     | Klopper et al. [105]; Smith and Crouch [155]  | 100 |

| Taxon Name and Authority                                      | Family and Growth Form  | Distribution                                                                                                                                                                                                                                                               | Elevation Range (m a.s.l.) | Habitat, Vegetation Type(s) and Biome(s)                                                                                               | Dominant Lithology                                  | Flowering Phenology | Red List Status       | Reference Voucher              | Taxon Authority Reference(s) | EI  |
|---------------------------------------------------------------|-------------------------|----------------------------------------------------------------------------------------------------------------------------------------------------------------------------------------------------------------------------------------------------------------------------|----------------------------|----------------------------------------------------------------------------------------------------------------------------------------|-----------------------------------------------------|---------------------|-----------------------|--------------------------------|------------------------------|-----|
| <i>Argyrobium sericosemium</i> Harms<br><br>[Taxon 71]        | Fabaceae<br><br>Forb    | KZN Midlands (Boston, Mt. Gilboa/Karkloof, Lions River, Fort Nottingham, Mawaqa, Richmond & Weenen districts), extending southwards to Ngeli & Weza districts, East Griqualand & two outlying records from the foothills of the KZN Drakensberg (near Kamberg & Underberg) | 1100–1800                  | Hill slopes & grassy plateaus in montane grassland; Mooi River Highland & Drakensberg Foothill Moist Grasslands (GB)                   | Grows mostly in dolerite-derived soils              | October–February    | Least Concern         | <i>JM Wood</i> 7194 PRE        | Edwards [156]                | 99  |
| <i>Asclepias bicuspis</i> N.E.Br.<br><br>[Taxon 72]           | Apocynaceae<br><br>Forb | Boston, Dargle, Howick & Rietvlei districts, central KZN Midlands                                                                                                                                                                                                          | 1200–1500                  | Annually burnt moist mistbelt grassland; Midlands Mistbelt & Mooi River Highland Grasslands (GB)                                       | Grows mostly in well-drained dolerite-derived soils | October–January     | Critically Endangered | <i>EE Galpin</i> 2735 PRE      | Scott-Shaw [23]              | 100 |
| <i>Asclepias concinna</i> (Schltr.) Schltr.<br><br>[Taxon 73] | Apocynaceae<br><br>Forb | KZN Midlands, from Hlogoma Mtn (east of Underberg) to Nkonzo State Forest near Donnybrook, southwards to Umgano, southern KZN (possibly to Maclear)                                                                                                                        | 900–1600                   | Hilly slopes in annually burnt montane grassland; Mooi River Highland, Southern KZN Moist & Drakensberg Foothill Moist Grasslands (GB) | Grows mostly in dolerite-derived soils              | October–January     | Critically Endangered | <i>SM Berruti</i> 409 PRE      | Scott-Shaw [23]              | 100 |
| <i>Asclepias woodii</i> (Schltr.) Schltr.<br><br>[Taxon 74]   | Apocynaceae<br><br>Forb | KZN Midlands, from Dargle, Howick, Midmar & Karkloof districts further north to Melmoth                                                                                                                                                                                    | 900–1600                   | Moist grasslands; Midlands Mistbelt, Mooi River Highland & Southern KZN Moist Grasslands (GB)                                          | Grows mostly in dolerite-derived soils              | October–January     | Vulnerable            | <i>C Carbutt</i> 35 of 2021 NU | Scott-Shaw [23]              | 100 |
| <i>Aspidonepsis flava</i> (N.E.Br.) Nicholas & Goyder         | Apocynaceae<br><br>Forb | Widespread in the KZN Midlands to foothills of the KZN Drakensberg &                                                                                                                                                                                                       | 600–2000                   | Annually burnt montane grassland (GB)                                                                                                  | Grows mostly in dolerite-derived soils              | November–January    | Least Concern         | <i>W Tyson</i> 1086 K          | Nicholas and Goyder [157]    | 97  |





| Taxon Name and Authority                                                                 | Family and Growth Form  | Distribution                                                                                                                                                          | Elevation Range (m a.s.l.) | Habitat, Vegetation Type(s) and Biome(s)                                                         | Dominant Lithology                                         | Flowering Phenology | Red List Status | Reference Voucher                   | Taxon Authority Reference(s) | EI  |
|------------------------------------------------------------------------------------------|-------------------------|-----------------------------------------------------------------------------------------------------------------------------------------------------------------------|----------------------------|--------------------------------------------------------------------------------------------------|------------------------------------------------------------|---------------------|-----------------|-------------------------------------|------------------------------|-----|
| <i>Ceropegia christianeae</i><br>(Peckover) Bruyns<br><br>[Taxon 81]                     | Apocynaceae<br><br>Forb | Between Nkandla & Melmoth, north-central KZN                                                                                                                          | 850–1300                   | Rocky outcrops in sandy soil; Midlands Mistbelt Grassland, Moist Coast Hinterland Grassland (GB) | Grows mostly in sandstone-derived soils of the Natal Group | November–March      | Vulnerable      | AM<br><i>Ngwenya</i><br>4590 NH     | Peckover [161]               | 100 |
| <i>Ceropegia cynniflora</i><br>R.A.Dyer<br><br>[Taxon 82]                                | Apocynaceae<br><br>Forb | Mooi River Valley near Muden, KZN Midlands                                                                                                                            | 1000–1100                  | Steep woody hillsides near watercourses in valley thicket; Thukela Valley Bushveld (SB)          | Grows mostly in shale-derived soils                        | January–March       | Vulnerable      | W.<br><i>Cronwright</i><br>26 PRE   | Dyer [162]                   | 100 |
| <i>Ceropegia franksiae</i> subsp. <i>franksiae</i> (N.E.Br.)<br>Bruyns<br><br>[Taxon 83] | Apocynaceae<br><br>Forb | Camperdown to Pietermaritzburg districts, KZN Midlands                                                                                                                | 700–800                    | Grassland; KZN Hinterland Thornveld, Midlands Mistbelt & Dry Coast Hinterland Grassland (GB–SB)  | Grows mostly in shale & sandstone-derived soils            | September–November  | Vulnerable      | TJ Edwards<br>558 NU                | Dyer [163]                   | 100 |
| <i>Ceropegia gilboaensis</i><br>Heiduk, N.R.Crouch & D.Styles<br><br>[Taxon 84]          | Apocynaceae<br><br>Forb | Mt. Gilboa & Mbona NRs (Karkloof), Howick district, KZN Midlands                                                                                                      | 1320–1670                  | Edges of exposed rock sheets & outcrops, Midlands Mistbelt & Mooi River Highland Grasslands (GB) | Grows in dolerite-derived soils                            | October–December    | Endangered      | DGA Styles<br>& A Heiduk<br>5841 NU | Heiduk et al. [164]          | 100 |
| <i>Ceropegia modestantha</i><br>Bruyns<br><br>[Taxon 85]                                 | Apocynaceae<br><br>Forb | Nkandla to Noodsberg & Kranskop districts in the KZN Midlands, with outlying records from Waterval Boven (1928) in Mpumalanga & Umzinto (1965) on the KZN South Coast | (300) 900–1200             | Shallow soils amongst rocky outcrops in dry sandstone grasslands (GB–IOCB)                       | Grows mostly in sandstone-derived soils of the Natal Group | October–February    | Near Threatened | LEW Codd<br>6984 PRE                | Dyer [163]                   | 98  |

| Taxon Name and Authority                                                | Family and Growth Form                           | Distribution                                                                                                                        | Elevation Range (m a.s.l.) | Habitat, Vegetation Type(s) and Biome(s)                                                                                                                                               | Dominant Lithology                                 | Flowering Phenology | Red List Status | Reference Voucher                         | Taxon Authority Reference(s) | EI  |
|-------------------------------------------------------------------------|--------------------------------------------------|-------------------------------------------------------------------------------------------------------------------------------------|----------------------------|----------------------------------------------------------------------------------------------------------------------------------------------------------------------------------------|----------------------------------------------------|---------------------|-----------------|-------------------------------------------|------------------------------|-----|
| <i>Ceropegia petrophila</i> Bruyns<br>[Taxon 86]                        | Apocynaceae<br><br>Forb                          | KZN Midlands (Dargle, Byrne, Boston–Boschberg & Richmond districts) towards the foothills of the southern KZN Drakensberg           | 1400–2400                  | Shallow ground bordering rock sheets in moist grassland; Midlands Mistbelt, Mooi River Highland & Drakensberg Foothill Moist Grasslands (GB)                                           | Grows mostly in dolerite-derived soils             | October–February    | Vulnerable      | <i>OM Hilliard</i> 5601 PRE               | Dyer [165]                   | 100 |
| <i>Cineraria glandulosa</i> Cron<br>[Taxon 87]                          | Asteraceae<br><br>Forb                           | South-central KZN Midlands (Umlazi, Mpendle & New Hanover districts) with an outlying population at Murchison                       | (630)<br>1400–1800         | Amongst grass & rocks on slopes of river valleys, or at base of cliffs above river gorges; Mooi River Highland, Moist Coast Hinterland & Southern Drakensberg Highland Grasslands (GB) | Grows mostly in dolerite & sandstone-derived soils | March–April         | Vulnerable      | <i>OM Hilliard &amp; BL Burt</i> 14512 NU | Cron et al. [166]            | 99  |
| <i>Cineraria grandibracteata</i> Hilliard<br>[Taxon 88]                 | Asteraceae<br><br>Forb                           | Central & southern KZN Midlands through to an outlier in the Barkly East district (north-eastern Cape) & KZN south coast hinterland | (450)<br>1200–1900         | Grows amongst rocky outcrops & boulders in grassland on mountain tops & slopes (GB)                                                                                                    | Grows in dolerite & sandstone-derived soils        | February–June       | Least Concern   | <i>OM Hilliard</i> 8095 NU                | Cron et al. [166]            | 98  |
| <i>Combretum stylesii</i> O.Maurin, Jordaan & A.E.van Wyk<br>[Taxon 89] | Combretaceae<br><br>Climber (liana)–slender tree | Mabhobhane near Mapumulo, Tugela River Basin, eastern KZN Midlands                                                                  | 550–650                    | Riverbanks, Eastern Valley Bushveld (SB)                                                                                                                                               | Grows in shale-derived soils                       | October–December    | Endangered      | <i>DGA Styles</i> 2489 NH                 | Maurin et al. [167]          | 100 |

| Taxon Name and Authority                                                                  | Family and Growth Form          | Distribution                                                                                                                        | Elevation Range (m a.s.l.) | Habitat, Vegetation Type(s) and Biome(s)                                                                                     | Dominant Lithology                          | Flowering Phenology  | Red List Status | Reference Voucher                           | Taxon Authority Reference(s) | EI  |
|-------------------------------------------------------------------------------------------|---------------------------------|-------------------------------------------------------------------------------------------------------------------------------------|----------------------------|------------------------------------------------------------------------------------------------------------------------------|---------------------------------------------|----------------------|-----------------|---------------------------------------------|------------------------------|-----|
| <i>Conium fontanum</i> Hilliard & B.L.Burttt var. <i>silvaticum</i> Hilliard & B.L.Burttt | Apiaceae<br><br>Forb            | Bulwer district southwards to Ngeli Mtn & the KZN Midlands (Dargle, Karkloof & Byrne)                                               | 900–1525                   | Tall, coarse vegetation along shaded streams or forest margins in moist grassland (GB)                                       | Grows mostly in dolerite-derived soils      | November–February    | Least Concern   | <i>OM Hilliard &amp; BL Burttt</i> 10542 NU | Hilliard and Burttt [168]    | 100 |
| [Taxon 90]                                                                                |                                 |                                                                                                                                     |                            |                                                                                                                              |                                             |                      |                 |                                             |                              |     |
| <i>Crotalaria dura</i> J.M.Wood & M.S.Evans subsp. <i>dura</i>                            | Fabaceae<br><br>Forb–subshrub   | Greytown & Noodsberg in the KZN Midlands to Weza, southern KZN                                                                      | 700–1200                   | Grassy slopes in moist grassland (GB)                                                                                        | Grows in dolerite & sandstone-derived soils | October–February     | Near Threatened | <i>JM Wood</i> 385 PRE                      | Polhill [169]                | 99  |
| [Taxon 91]                                                                                |                                 |                                                                                                                                     |                            |                                                                                                                              |                                             |                      |                 |                                             |                              |     |
| <i>Cynorkis compacta</i> (Rchb.f.) Rolfe                                                  | Orchidaceae<br><br>Forb         | New Hanover district in the KZN Midlands to between Pietermaritzburg & Durban & Dumisa districts                                    | 700–1500                   | Rocky crevices, cliffs & sandstone outcrops in moist grassland; KZN Sandstone Sourveld, KZN Coastal Belt Grassland (SB–IOCB) | Grows in sandstone-derived soils            | August–October       | Vulnerable      | <i>OM Hilliard</i> 3983 NU                  | Johnson and Bytebier [130]   | 99  |
| [Taxon 92]                                                                                |                                 |                                                                                                                                     |                            |                                                                                                                              |                                             |                      |                 |                                             |                              |     |
| <i>Cyrtanthus falcatus</i> R.A.Dyer                                                       | Amaryllidaceae<br><br>Geophyte  | KZN Midlands (Estcourt, Nottingham Road & Impendle districts), Drakensberg foothills (Lotheni) to Kokstad district, East Griqualand | 1100–1900                  | Crevices of steep, south-facing cliffs near streams & watercourses in moist montane grasslands (GB)                          | Grows on dolerite & sandstone cliffs        | Late August–November | Rare            | <i>RG Strey</i> 7688 PRE                    | Duncan et al. [121]          | 99  |
| [Taxon 93]                                                                                |                                 |                                                                                                                                     |                            |                                                                                                                              |                                             |                      |                 |                                             |                              |     |
| <i>Delosperma galpinii</i> L.Bolus                                                        | Aizoaceae<br><br>Succulent forb | Van Reenen’s Pass to the KZN Midlands & southwards to Ngeli Mt., East Griqualand                                                    | 1000–1800                  | Rocky outcrops & hill summits (GB)                                                                                           | Grows in dolerite & sandstone-derived soils | November–December    | Least Concern   | <i>A Nicholas</i> 1715 UDW                  | New POSA [26]                | 99  |
| [Taxon 94]                                                                                |                                 |                                                                                                                                     |                            |                                                                                                                              |                                             |                      |                 |                                             |                              |     |
| <i>Delosperma saturatum</i> L.Bolus                                                       | Aizoaceae<br><br>Succulent forb | Vryheid & Louwsburg districts, northern KZN, to Qudeni & central KZN Midlands (Dundee,                                              | 1000–1500                  | Rock sheets in grassland (GB)                                                                                                | Grows in dolerite & sandstone-derived soils | November–March       | Least Concern   | <i>J Gerstner</i> 21985 BOL                 | New POSA [26]                | 100 |
| [Taxon 95]                                                                                |                                 |                                                                                                                                     |                            |                                                                                                                              |                                             |                      |                 |                                             |                              |     |

| Taxon Name and Authority                                 | Family and Growth Form          | Distribution                                                                                                                                                                                                                    | Elevation Range (m a.s.l.) | Habitat, Vegetation Type(s) and Biome(s)                                                                      | Dominant Lithology                          | Flowering Phenology | Red List Status                       | Reference Voucher                         | Taxon Authority Reference(s) | EI  |
|----------------------------------------------------------|---------------------------------|---------------------------------------------------------------------------------------------------------------------------------------------------------------------------------------------------------------------------------|----------------------------|---------------------------------------------------------------------------------------------------------------|---------------------------------------------|---------------------|---------------------------------------|-------------------------------------------|------------------------------|-----|
|                                                          |                                 | Greytown & Muden districts)                                                                                                                                                                                                     |                            |                                                                                                               |                                             |                     |                                       |                                           |                              |     |
| <i>Delosperma smythae</i><br>L.Bolus<br><br>[Taxon 96]   | Aizoaceae<br><br>Succulent forb | Oliviershoek Pass on the KZN/Free State border to the KZN Midlands (Bulwer, Estcourt & Muden districts), southwards to Ngeli, East Griqualand                                                                                   | 1100–1700                  | Rock sheets in grassland (GB)                                                                                 | Grows in dolerite & sandstone-derived soils | November–March      | Least Concern                         | <i>J Thode 3771</i><br>PRE                | Scott-Shaw [23]              | 100 |
| <i>Delosperma velutinum</i><br>L.Bolus<br><br>[Taxon 97] | Aizoaceae<br><br>Succulent forb | Nongoma, Muden, Kranskop, Pietermaritzburg (Table Mountain) to Umtwalume districts                                                                                                                                              | 800–1300                   | Rock crevices & ledges of north- & west-facing cliffs, Eastern Valley Bushveld (SB)                           | Grows on sandstone-derived cliffs           | November–May        | Data Deficient – Taxon’ly Problematic | <i>DJB Killick 434</i> NU                 | Lavis [170]                  | 99  |
| <i>Dierama dissimile</i> Hilliard<br><br>[Taxon 98]      | Iridaceae<br><br>Geophyte       | Harrismith district, southwards to KZN Midlands (Estcourt, Mooi River, Dargle, Lions River, Fort Nottingham & Bulwer districts), towards foothills of the KZN Drakensberg & southwards to Elliot & Cala districts, Eastern Cape | 1400–1900                  | Sloping grasslands; Midlands Mistbelt & Drakensberg Foothill Moist Grasslands (GB)                            | Grows in dolerite & sandstone-derived soils | October–January     | Least Concern                         | <i>OM Hilliard &amp; BL Burt</i> 13388 NU | Hilliard and Burt [123]      | 98  |
| <i>Dierama dubium</i> N.E.Br.<br><br>[Taxon 99]          | Iridaceae<br><br>Geophyte       | Northern KZN Midlands from Melmoth, Nkandla, Babanango to Mapumulo & Kranskop districts & NE KZN coastal hinterland                                                                                                             | 900–1500                   | Grassland; Northern Zululand Sourveld, Midlands Mistbelt Grassland & Moist Coast Hinterland Grassland (GB–SB) | Grows mostly in sandstone-derived soils     | August–January      | Vulnerable                            | <i>R Williams 1234</i> NH                 | Hilliard and Burt [123]      | 99  |
| <i>Dierama floriferum</i><br>Hilliard<br><br>[Taxon 100] | Iridaceae<br><br>Geophyte       | Southern Mpumalanga, KZN Midlands to NE Eastern Cape                                                                                                                                                                            | 800–1600                   | Gently sloping moist grassland (GB)                                                                           | Grows mostly in dolerite-derived soils      | September–January   | Least Concern                         | <i>C Carbutt 06 of 2022</i> NU            | Hilliard and Burt [123]      | 99  |

| Taxon Name and Authority                              | Family and Growth Form          | Distribution                                                                                                                                                                                | Elevation Range (m a.s.l.) | Habitat, Vegetation Type(s) and Biome(s)                                                                                      | Dominant Lithology                          | Flowering Phenology | Red List Status | Reference Voucher                               | Taxon Authority Reference(s) | EI  |
|-------------------------------------------------------|---------------------------------|---------------------------------------------------------------------------------------------------------------------------------------------------------------------------------------------|----------------------------|-------------------------------------------------------------------------------------------------------------------------------|---------------------------------------------|---------------------|-----------------|-------------------------------------------------|------------------------------|-----|
| <i>Dierama luteoalbidum</i> I.Verd.<br>[Taxon 101]    | Iridaceae<br>Geophyte           | KZN Midlands, from Nottingham Road, Dargle, Karkloof, Blinkwater & Lake Merthley                                                                                                            | 1100–1700                  | Open, moist grassland; Midlands Mistbelt & Mooi River Highland Grasslands (GB)                                                | Grows in deep dolerite-derived soils        | October–January     | Vulnerable      | <i>C Carbutt &amp; JD Craigie 01 of 2019</i> NU | Hilliard and Burttt [123]    | 100 |
| <i>Dierama nixonianum</i> Hilliard<br>[Taxon 102]     | Iridaceae<br>Geophyte           | Wakkerstroom & Groenvlei districts, southern Mpumalanga, to the KZN Midlands (Mapumulo, New Hanover, Noodsberg, Karkloof/Mt. Gilboa & Hilton districts)                                     | 800–1800                   | Open, moist grassland; Midlands Mistbelt, Mooi River Highland, Moist Coast Hinterland & Paulpietersburg Moist Grasslands (GB) | Grows in dolerite & sandstone-derived soils | Late August–October | Vulnerable      | <i>C Carbutt 07 of 2022</i> NU                  | Hilliard and Burttt [123]    | 100 |
| <i>Dierama pumilum</i> N.E.Br.<br>[Taxon 103]         | Iridaceae<br>Geophyte           | Ngome to Nkandla, Noodsberg & New Hanover districts (northern & central KZN Midlands)                                                                                                       | 900–1200                   | Rocky grassland; Northern Zululand Mistbelt Grassland & KZN Sandstone Sourveld (GB–SB)                                        | Grows in dolerite & sandstone-derived soils | December–February   | Vulnerable      | <i>OM Hilliard &amp; BL Burttt 16308</i> K      | Hilliard and Burttt [123]    | 100 |
| <i>Dierama reynoldsii</i> I.Verd.<br>[Taxon 104]      | Iridaceae<br>Geophyte           | KZN Midlands (Mooi River, Howick, Harding, Impendle, Donnybrook, Ixopo districts), coastwards to Umzinto & southwards to East Griqualand & EC Midlands (Maclear, Ugie, Engcobo & Mt. Frere) | 850–1600                   | Sloping grasslands; Midlands Mistbelt & Drakensberg Foothill Moist Grasslands (GB)                                            | Grows mostly in dolerite-derived soils      | November–February   | Least Concern   | <i>C Carbutt 02 of 2019</i> NU                  | Hilliard and Burttt [123]    | 97  |
| <i>Emplectanthus gerrardii</i> N.E.Br.<br>[Taxon 105] | Apocynaceae<br>Climber (twiner) | Qudeni to central KZN Midlands (Karkloof, Blinkwater & Richmond districts), southwards to Ngeli, southern KZN                                                                               | 850–1700                   | Shaded forest canopy & understorey in forest, often near streams; Southern Mistbelt Forest (FB)                               | Grows mostly in dolerite-derived soils      | December–January    | Vulnerable      | <i>WT Gerrard 2167</i> K                        | Meve [171]                   | 100 |

| Taxon Name and Authority                                                | Family and Growth Form               | Distribution                                                                                                                                     | Elevation Range (m a.s.l.) | Habitat, Vegetation Type(s) and Biome(s)                                                                                                                                                    | Dominant Lithology                         | Flowering Phenology | Red List Status       | Reference Voucher                           | Taxon Authority Reference(s)    | EI  |
|-------------------------------------------------------------------------|--------------------------------------|--------------------------------------------------------------------------------------------------------------------------------------------------|----------------------------|---------------------------------------------------------------------------------------------------------------------------------------------------------------------------------------------|--------------------------------------------|---------------------|-----------------------|---------------------------------------------|---------------------------------|-----|
| <i>Encephalartos cerinus</i><br>Lavranos & D.L.Goode<br><br>[Taxon 106] | Zamiaceae<br><br>Cycad               | Buffalo River Gorge, Tugela Ferry district, central KZN                                                                                          | 850–950                    | Dry, hot, east-facing cliff faces in rocky grassy savanna; Thukela Valley Bushveld (SB)                                                                                                     | Grows mostly on sandstone cliffs           | February            | Critically Endangered | <i>D Goode</i> 4 NH                         | Lavranos and Goode [172]        | 100 |
| <i>Encephalartos msinganus</i><br>Vorster<br><br>[Taxon 107]            | Zamiaceae<br><br>Cycad               | Msinga Mtn, Tugela Ferry district, central KZN                                                                                                   | 900–1200                   | Cliff faces & steep rocky, wooded north-facing slopes; KZN Highland Thornveld (GB)                                                                                                          | Grows mostly on sandstone cliffs           | February–April      | Critically Endangered | <i>P Vorster</i> 2949a PRE                  | Vorster [173]; Vorster [174]    | 100 |
| <i>Erica psittacina</i><br>E.G.H.Oliv. & I.M.Oliv.<br><br>[Taxon 108]   | Ericaceae<br><br>Shrub               | Hlabeni Mtn, Creighton district, KZN Midlands                                                                                                    | 1600–1700                  | Steep southeast-facing slopes below summit ridge, in dense shrubby vegetation close to forest margins; interface of Drakensberg Foothill Moist Grassland & Southern Mistbelt Forest (GB–FB) | Grows in dolerite-derived soils            | January–February    | Endangered            | <i>EGH Oliver &amp; RC Turner</i> 12167 NBG | Oliver and Oliver [175]         | 100 |
| <i>Euphorbia pseudocactus</i><br>A.Berger<br><br>[Taxon 109]            | Euphorbiaceae<br><br>Succulent shrub | Greytown, Keate’s Drift, Kranskop, Muden (Mooi River Valley) & Weenen districts, central KZN                                                     | 750–950                    | Dry rocky areas of thicket & open woodland; Thukela Valley Bushveld (SB)                                                                                                                    | Grows mostly in eroded shale-derived soils | July–August         | Least Concern         | <i>JPH Acocks</i> 10528 PRE                 | Scott-Shaw [23]; Pooley [31]    | 100 |
| <i>Fanninia caloglossa</i> Harv.<br><br>[Taxon 110]                     | Apocynaceae<br><br>Forb              | Ngome, northern KZN, to KZN Midlands (Byrne & Karkloof districts) to Umgano, southern KZN, Drakensberg foothills & NE Eastern Cape (to Hogsback) | 750–2500                   | Mistbelt & montane grassland (GB)                                                                                                                                                           | Grows mostly in dolerite-derived soils     | November–January    | Least Concern         | <i>OM Hilliard &amp; BL Burt</i> 7837 NU    | Scott-Shaw [23]; Nicholas [176] | 97  |

| Taxon Name and Authority                                                          | Family and Growth Form               | Distribution                                                                                                                              | Elevation Range (m a.s.l.) | Habitat, Vegetation Type(s) and Biome(s)                                                                                                       | Dominant Lithology                                  | Flowering Phenology | Red List Status | Reference Voucher                         | Taxon Authority Reference(s)         | EI  |
|-----------------------------------------------------------------------------------|--------------------------------------|-------------------------------------------------------------------------------------------------------------------------------------------|----------------------------|------------------------------------------------------------------------------------------------------------------------------------------------|-----------------------------------------------------|---------------------|-----------------|-------------------------------------------|--------------------------------------|-----|
| <i>Gasteria tukhelensis</i> Van Jaarsv.<br><br>[Taxon 111]                        | Asphodelaceae<br><br>Succulent forb  | Lower Tugela River Basin, Kranskop district, central KZN                                                                                  | 450–550                    | Southwest-facing cliff faces in Thukela Valley Bushveld (SB)                                                                                   | Grows on shale-derived cliff faces                  | December–March      | Rare            | <i>EJ Van Jaarsveld</i> 17996 NBG         | Van Jaarsveld and Van Wyk [177]      | 100 |
| <i>Geranium natalense</i> Hilliard & B.L.Burt<br><br>[Taxon 112]                  | Geraniaceae<br><br>Forb              | KZN Midlands (Nottingham Road, Balgowan to Byrne, Karkloof & Greytown districts) & southern KZN Drakensberg foothills                     | 1100–1600                  | Grassy margins of small wetlands & streams; Midlands Mistbelt, Southern KZN Moist & Drakensberg Foothill Moist Grasslands (GB)                 | Grows mostly in dolerite-derived gleyic soils       | November–April      | Vulnerable      | <i>BD Schrire</i> 2239 NU                 | Hilliard and Burt [178]              | 100 |
| <i>Gerbera aurantiaca</i> Sch.Bip.<br><br>[Taxon 113]                             | Asteraceae<br><br>Forb               | KZN Midlands northwards to southern Mpumalanga (Badplaas & Carolina districts)                                                            | 900–1800                   | Moist grassland; Midlands Mistbelt, Northern Zululand Mistbelt, KaNgwane Montane, Paulpietersburg Moist & Wakkerstroom Montane Grasslands (GB) | Grows mostly in well-drained dolerite-derived soils | September–December  | Endangered      | <i>C Carbutt</i> 20 of 2017 NU            | Scott-Shaw [23]                      | 98  |
| <i>Gerbera sylvicola</i> I.M.Johnson, N.R.Crouch & T.J.Edwards<br><br>[Taxon 114] | Asteraceae<br><br>Forb               | Known from three forests in north-central KZN (Kranskop, Nkandla & Ilembe districts)                                                      | (500)<br>800–1100          | Southeast-facing slopes near streams & amongst boulders in forest understory; Southern Mistbelt & Scarp Forests (FB)                           | Grows in sandstone-derived soils of the Natal Group | September–January   | Least Concern   | <i>IM Johnson &amp; NR Crouch</i> 1342 NU | Johnson et al. [179]                 | 100 |
| <i>Gymnosporia devenishii</i> Jordaan<br><br>[Taxon 115]                          | Celastraceae<br><br>Shrub–small tree | Wakkerstroom, southern Mpumalanga, to Luneburg, Utrecht, Pongola Bush & Ncandu districts to KZN Midlands (Greytown, Kranskop & Donnybrook | 800–2000                   | Forest understorey & forest margins of mistbelt & montane forests (FB)                                                                         | Grows in dolerite & sandstone-derived soils         | December–April      | Rare            | <i>NJ Devenish</i> 1579 PRE               | Boon [32]; Jordaan and Van Wyk [180] | 99  |

| Taxon Name and Authority                                            | Family and Growth Form           | Distribution                                                                                                                                                                     | Elevation Range (m a.s.l.) | Habitat, Vegetation Type(s) and Biome(s)                                                          | Dominant Lithology                      | Flowering Phenology | Red List Status       | Reference Voucher                         | Taxon Authority Reference(s)         | EI  |
|---------------------------------------------------------------------|----------------------------------|----------------------------------------------------------------------------------------------------------------------------------------------------------------------------------|----------------------------|---------------------------------------------------------------------------------------------------|-----------------------------------------|---------------------|-----------------------|-------------------------------------------|--------------------------------------|-----|
|                                                                     |                                  | districts), southwards to Underberg & Ngeli & Mt. Frere & Mt. Ayloff                                                                                                             |                            |                                                                                                   |                                         |                     |                       |                                           |                                      |     |
| <i>Gymnosporia macrocarpa</i> Jordaan<br>[Taxon 116]                | Celastraceae<br>Shrub–small tree | Greytown, Keate’s Drift, Muden (Mooi River Valley) & Weenen districts, Tugela River Basin, central KZN                                                                           | 750–1500                   | Dry thornveld & valley bushveld; Thukela Valley Bushveld (SB)                                     | Grows mostly in shale-derived soils     | September–February  | Least Concern         | <i>S Venter</i> 1839 PRE                  | Boon [32]; Jordaan and Van Wyk [180] | 100 |
| <i>Helichrysum argentissimum</i> J.M.Wood<br>[Taxon 117]            | Asteraceae<br>Forb               | Bergville district southwards to KZN Midlands (Estcourt, Lions River, New Hanover & Umvoti districts), southwards to Mt. Currie (East Griqualand) & Mt. Insizwa & Mt. Tabankulu) | 900–2300                   | Rocky grass slopes, sandstone cliffs & platforms (GB)                                             | Grows mostly in sandstone-derived soils | September–March     | Least Concern         | <i>OM Hilliard &amp; BL Burt</i> 7319 NU  | Hilliard [128]                       | 99  |
| <i>Helichrysum citricephalum</i> Hilliard & B.L.Burt<br>[Taxon 118] | Asteraceae<br>Shrub              | Ixopo district, KZN Midlands, between Ixopo & Umzimkulu                                                                                                                          | 1050–1150                  | Course scrub in forest-grassland ecotone & along drainage lines; Midlands Mistbelt Grassland (GB) | Grows in dolerite-derived soils         | February–March      | Critically Endangered | <i>C Carbutt</i> 26 of 2021 NU            | Hilliard [128]; Carbutt [181]        | 100 |
| <i>Helichrysum ephelos</i> Hilliard<br>[Taxon 119]                  | Asteraceae<br>Forb               | Southern Mpumalanga, to KZN Midlands (Fort Nottingham, Lions River & Mpendle districts) to northern Eastern Cape (Mt. Insizwa & Mt. Ayloff)                                      | 1600–2200                  | Edges of wetlands & marshy areas around the headwaters of streams (GB)                            | Grows mostly in dolerite-derived soils  | February–May        | Rare                  | <i>OM Hilliard &amp; BL Burt</i> 10329 NU | Hilliard [128]                       | 98  |
| <i>Helichrysum haygarthii</i> Bolus<br>[Taxon 120]                  | Asteraceae<br>Subshrub           | Rensburg’s Kop & Van Reenen’s Pass, low Drakensberg escarpment on the Free State/KZN border                                                                                      | 1980–2225                  | Grows on weathered basalt cliffs; Basotho Montane Shrubland, uKhahlamba Basalt Grassland, Low     | Grows in shallow, basalt-derived soils  | December–February   | Rare                  | <i>OM Hilliard</i> 4986 NU                | Hilliard [128]                       | 100 |



| Taxon Name and Authority                                           | Family and Growth Form    | Distribution                                                                                                                                                                                                             | Elevation Range (m a.s.l.) | Habitat, Vegetation Type(s) and Biome(s)                                                         | Dominant Lithology                               | Flowering Phenology | Red List Status | Reference Voucher                           | Taxon Authority Reference(s) | EI  |
|--------------------------------------------------------------------|---------------------------|--------------------------------------------------------------------------------------------------------------------------------------------------------------------------------------------------------------------------|----------------------------|--------------------------------------------------------------------------------------------------|--------------------------------------------------|---------------------|-----------------|---------------------------------------------|------------------------------|-----|
|                                                                    |                           |                                                                                                                                                                                                                          |                            | Escarpment Moist Grassland (GB)                                                                  |                                                  |                     |                 |                                             |                              |     |
| <i>Helichrysum inornatum</i><br>Hilliard & B.L.Burt<br>[Taxon 121] | Asteraceae<br><br>Forb    | KZN Midlands (Impendle district), southwards to Ngeli Mtn (East Griqualand) & towards Drakensberg foothills near Underberg                                                                                               | 1800–2100                  | Damp montane grassland, often on steep slopes (GB)                                               | Grows mostly in dolerite-derived soils           | December–January    | Least Concern   | <i>OM Hilliard &amp; BL Burt</i><br>7888 NU | Hilliard [128]               | 99  |
| <i>Helichrysum oligopappum</i><br>Bolus<br>[Taxon 122]             | Asteraceae<br><br>Forb    | KZN Midlands (New Hanover, Noodsberg, Karkloof, Lions River, Mooi River & Mpendle districts)                                                                                                                             | 900–1800                   | Rocky grassland; Midlands Mistbelt, Mooi River Highland & Moist Coast Hinterland Grasslands (GB) | Grows in dolerite & sandstone-derived soils      | February–April      | Vulnerable      | <i>JM Wood</i><br>4142 NH                   | Hilliard [128]               | 100 |
| <i>Helichrysum petraeum</i><br>Hilliard<br>[Taxon 123]             | Asteraceae<br><br>Forb    | Nkandla district to Dargle, Mpendhle, Byrne & Richmond districts, KZN Midlands, with a northern outlier in Mbabane district, Eswatini                                                                                    | 1400–1700                  | Edges & crevices of damp rock sheets in grassland (GB)                                           | Grows in thin dolerite & sandstone-derived soils | March–April         | Least Concern   | <i>OM Hilliard</i><br>8092 NU               | Hilliard [128]               | 99  |
| <i>Hermannia sandersonii</i><br>Harv.<br>[Taxon 124]               | Malvaceae<br><br>Subshrub | Louwsburg & Vryheid districts, northern KZN, to the KZN Midlands (New Hanover, Noodsberg, Umvoti & Pietermaritzburg (Table Mtn & Thornville) districts & towards coastal hinterland (Hammarisdale, Inchanga & Shongweni) | 600–1400                   | Rocky grassland on hill slopes (GB–SB)                                                           | Grows in sandstone-derived soils                 | September–March     | Vulnerable      | <i>CH Stirton</i><br>5441 K                 | Pooley [31]                  | 100 |
| <i>Huttonaea fimbriata</i><br>(Harv.) Rchb.f.<br>[Taxon 125]       | Orchidaceae<br><br>Forb   | Luneburg district, northern KZN, throughout the KZN Midlands (Dargle, Donnybrook, Hlabeni) &                                                                                                                             | 1200–2000                  | Understory of cool mistbelt & montane forests (FB)                                               | Grows in dolerite & sandstone-derived soils      | January–March       | Least Concern   | <i>JM Wood</i><br>5555 NH                   | Johnson and Bytebier [130]   | 97  |

| Taxon Name and Authority                                                 | Family and Growth Form              | Distribution                                                                                                                          | Elevation Range (m a.s.l.) | Habitat, Vegetation Type(s) and Biome(s)                                              | Dominant Lithology                          | Flowering Phenology | Red List Status | Reference Voucher  | Taxon Authority Reference(s) | EI  |
|--------------------------------------------------------------------------|-------------------------------------|---------------------------------------------------------------------------------------------------------------------------------------|----------------------------|---------------------------------------------------------------------------------------|---------------------------------------------|---------------------|-----------------|--------------------|------------------------------|-----|
|                                                                          |                                     | foothills of the KZN Drakensberg to Kokstad in southern KZN & Nqadu in Eastern Cape                                                   |                            |                                                                                       |                                             |                     |                 |                    |                              |     |
| <i>Huttonaea woodii</i> Schltr.<br><br>[Taxon 126]                       | Orchidaceae<br><br>Forb             | KZN Midlands to Drakensberg foothills                                                                                                 | 1200–2100                  | Damp, marshy grassland; Midlands Mistbelt Grassland, uKhahlamba Basalt Grassland (GB) | Grows in dolerite & basalt-derived soils    | January–February    | Vulnerable      | WR Trauseld 979 NU | Johnson and Bytebier [130]   | 99  |
| <i>Indigofera krookii</i> Schltr. ex Zahlbr.<br><br>[Taxon 127]          | Fabaceae<br><br>Forb                | Babanango district, northern KZN, to Estcourt, Mooi River & Ixopo districts, southwards to Mt. Currie, East Griqualand, southern KZN  | 1000–1700                  | Rocky outcrops in grassland (GB)                                                      | Grows mostly in dolerite-derived soils      | December–February   | Least Concern   | JM Wood 3523 BOL   | Schlechter [182]             | 100 |
| <i>Indigofera woodii</i> Bolus var. <i>laxa</i> Bolus<br><br>[Taxon 128] | Fabaceae<br><br>Forb–subshrub       | Babanango district, northern KZN, to Colenso district, KZN Midlands, towards the coastal hinterland (Hammarisdale & Inanda districts) | 600–1100                   | Rocky hill slopes in grassland (GB)                                                   | Grows mostly in sandstone derived soils     | November–March      | Least Concern   | JM Wood 974 K      | Pooley [31]                  | 100 |
| <i>Justicia natalensis</i> (Nees) T.Anderson<br><br>[Taxon 129]          | Acanthaceae<br><br>Forb             | KZN Midlands (Howick, Ixopo, Richmond & Pietermaritzburg districts) towards the coastal hinterland (Inchanga & Inanda districts)      | 500–1200                   | Mistbelt & ngongoni grasslands (GB–SB)                                                | Grows in dolerite & sandstone-derived soils | September–December  | Least Concern   | CFF Krauss 453 M   | Scott-Shaw [23]              | 100 |
| <i>Kalanchoe longiflora</i> Schltr. ex J.M.Wood<br><br>[Taxon 130]       | Crassulaceae<br><br>Succulent shrub | Tugela Ferry to Muden districts, Tugela River Basin, central KZN                                                                      | 800–1100                   | Cliff-dweller on rock faces & rocky slopes; Thukela Valley Bushveld (SB)              | Grows in shale-derived soils                | April–June          | Vulnerable      | JM Wood 4439 NH    | Tölken [183]                 | 100 |

| Taxon Name and Authority                                         | Family and Growth Form    | Distribution                                                                                                                                                                                                                   | Elevation Range (m a.s.l.) | Habitat, Vegetation Type(s) and Biome(s)                                                                                  | Dominant Lithology                          | Flowering Phenology       | Red List Status | Reference Voucher              | Taxon Authority Reference(s) | EI |
|------------------------------------------------------------------|---------------------------|--------------------------------------------------------------------------------------------------------------------------------------------------------------------------------------------------------------------------------|----------------------------|---------------------------------------------------------------------------------------------------------------------------|---------------------------------------------|---------------------------|-----------------|--------------------------------|------------------------------|----|
| <i>Kniphofia albomontana</i> Baijnath<br><br>[Taxon 131]         | Asphodelaceae<br><br>Forb | Central KZN Midlands (Greytown, Balgowan & Estcourt districts- Ntabamhlope) to Rensburg’s Kop & Van Reenen's Pass, to the KZN & EC Drakensberg foothills                                                                       | 900–2000                   | Wet grassy seeps in grassland (GB)                                                                                        | Grows mostly in sandstone derived soils     | January– March            | Least Concern   | <i>H Baijnath 1876</i> UDW     | Baijnath [184]               | 97 |
| <i>Kniphofia brachystachya</i> (Zahlbr.) Codd<br><br>[Taxon 132] | Asphodelaceae<br><br>Forb | Central KZN Midlands (Lidgetton, Fort Nottingham, Mooi River & Nottingham Road districts), to the foothills of the Drakensberg & southwards to Ntsikeni & Ngeli (East Griqualand) & Eastern Cape midlands (Ugie & Mt. Insizwa) | 1200–2400                  | Montane grassland (GB)                                                                                                    | Grows mostly in dolerite-derived soils      | November– January         | Least Concern   | <i>WJ Haygarth 12062</i> NH    | Codd [131]                   | 98 |
| <i>Kniphofia breviflora</i> Baker<br><br>[Taxon 133]             | Asphodelaceae<br><br>Forb | NW KZN (Newcastle & Glencoe districts), KZN/Free State border (Rensburg’s Kop & Oliviershoek), central KZN Midlands (Nottingham Road & Umvoti districts) & towards the KZN Drakensberg                                         | 1000–2200                  | Montane grassland in wetlands & hillsides (GB)                                                                            | Grows in dolerite & sandstone-derived soils | October– March            | Least Concern   | <i>FRR Schlechter 6940</i> PRE | Codd [131]                   | 98 |
| <i>Kniphofia buchananii</i> Baker<br><br>[Taxon 134]             | Asphodelaceae<br><br>Forb | Babanango, Nkandla & Helpmekaar districts, north-central KZN, to KZN Midlands (Boston, Currys Post, Greytown, Hilton, Howick, Karkloof, Lions River, Noodsberg &                                                               | 600–1500                   | Rocky grassy slopes, outcrops & hilltops in moist grassland; Midlands Mistbelt Grassland & KZN Sandstone Sourveld (GB–SB) | Grows in dolerite & sandstone-derived soils | (October) February– March | Least Concern   | <i>C Carbutt 28 of 2017</i> NU | Scott-Shaw [23]; Codd [131]  | 99 |

| Taxon Name and Authority                                                           | Family and Growth Form    | Distribution                                                                                                                                             | Elevation Range (m a.s.l.) | Habitat, Vegetation Type(s) and Biome(s)                                                                                                                                           | Dominant Lithology                          | Flowering Phenology | Red List Status                       | Reference Voucher                               | Taxon Authority Reference(s) | EI  |
|------------------------------------------------------------------------------------|---------------------------|----------------------------------------------------------------------------------------------------------------------------------------------------------|----------------------------|------------------------------------------------------------------------------------------------------------------------------------------------------------------------------------|---------------------------------------------|---------------------|---------------------------------------|-------------------------------------------------|------------------------------|-----|
|                                                                                    |                           | Richmond districts) & Alverston, Cato Ridge, Dumisa & Ndwedwe (coastal hinterland)                                                                       |                            |                                                                                                                                                                                    |                                             |                     |                                       |                                                 |                              |     |
| <i>Kniphofia ichopensis</i><br>Schinz var. <i>aciformis</i><br>Codd<br>[Taxon 135] | Asphodelaceae<br><br>Forb | South-western KZN Midlands from Mahwaqa Mtn southwards to Umgano (near Ntsikeni) & westwards to the Kamberg district                                     | 1475–2050                  | South-facing, steep rocky slopes; Drakensberg Foothill Moist Grassland & Mooi River Highland Grassland (GB)                                                                        | Grows in dolerite & sandstone-derived soils | November            | Data Deficient (should be Vulnerable) | <i>C Carbutt &amp; JD Craigie 04 of 2011</i> NU | Carbutt [41]; Codd [131]     | 100 |
| <i>Kniphofia ichopensis</i><br>Schinz var. <i>ichopensis</i><br>[Taxon 136]        | Asphodelaceae<br><br>Forb | Central KZN Midlands (Balgowan, Creighton, Donnybrook, Estcourt, Greytown, Ixopo & Nottingham Road districts) up to the foothills of the KZN Drakensberg | 1000–1800                  | Moist grassland & wetlands; Midlands Mistbelt & Drakensberg Foothill Moist Grasslands (GB)                                                                                         | Grows mostly in dolerite-derived soils      | December–March      | Least Concern                         | <i>LEW Codd 10651</i> PRE                       | Codd [131]                   | 98  |
| <i>Kniphofia latifolia</i> Codd<br>[Taxon 137]                                     | Asphodelaceae<br><br>Forb | Central KZN Midlands, from Albert Falls, Greytown (Umvoti), New Hanover & Karkloof districts                                                             | 800–1620                   | Grassy slopes, streambanks & riverbanks, usually in moist depressions or at the edges of wetlands; Midlands Mistbelt, Mooi River Highland & Moist Coast Hinterland Grasslands (GB) | Grows in dolerite-derived soils             | October–November    | Endangered                            | <i>C Carbutt 34 of 2021</i> NU                  | Codd [131]                   | 100 |

| Taxon Name and Authority                                                                                                                                                                          | Family and Growth Form        | Distribution                                                                             | Elevation Range (m a.s.l.) | Habitat, Vegetation Type(s) and Biome(s)                                                                               | Dominant Lithology                           | Flowering Phenology | Red List Status                     | Reference Voucher                         | Taxon Authority Reference(s)          | EI  |
|---------------------------------------------------------------------------------------------------------------------------------------------------------------------------------------------------|-------------------------------|------------------------------------------------------------------------------------------|----------------------------|------------------------------------------------------------------------------------------------------------------------|----------------------------------------------|---------------------|-------------------------------------|-------------------------------------------|---------------------------------------|-----|
| <i>Ledebouria ovatifolia</i> (Baker) Jessop subsp. <i>scabrida</i> N.R.Crouch & T.J.Edwards<br><br>[Taxon 138]<br><br>(Includes <i>Ledebouria pustulata</i> S.Venter – taxonomically problematic) | Hyacinthaceae<br><br>Geophyte | Mdumbeni River Valley near Muden, to Greytown–Rietvlei & Nambithi, central KZN           | 1000–1300                  | East- & south-facing hillslopes & hill summits amongst boulders in thornveld savanna; Thukela Thornveld (SB)           | Grows mostly in thin, dolerite-derived soils | September           | Vulnerable                          | <i>TJ Edwards &amp; NR Crouch</i> 3260 NU | Crouch et al. [185]                   | 100 |
| <i>Leobordea sutherlandii</i> (Dümmer) B.-E.van Wyk & Boatwr.<br><br>[Taxon 139]                                                                                                                  | Fabaceae<br><br>Forb          | Pietermaritzburg district, central KZN Midlands                                          | 750–850                    | Rank moist grassland (GB)                                                                                              | Grows in colluvial soils                     | March               | Data Deficient–Taxon’ly Problematic | <i>OM Hilliard</i> 3886 NU                | Van Wyk [132]; Boatright et al. [186] | 100 |
| <i>Lotononis virgata</i> B.-E.van Wyk<br><br>[Taxon 140]                                                                                                                                          | Fabaceae<br><br>Subshrub      | Estcourt district to Mahwaqa Mtn (Bulwer district), south-western KZN Midlands           | 1600–1900                  | Streambanks & rocky outcrops; Mooi River Highland & Drakensberg Foothill Moist Grasslands (GB)                         | Grows in dolerite-derived soils              | January–March       | Vulnerable                          | <i>WR Trauseld</i> 720 PRE                | Van Wyk [132]                         | 100 |
| <i>Macrotyloma coddii</i> Verdc.<br><br>[Taxon 141]                                                                                                                                               | Fabaceae<br><br>Forb          | Kranskop, Greytown (Umvoti), Mapumulo & Noodsberg districts, central KZN                 | 1000–1200                  | Rocky grasslands on steep hillslopes; Midlands Mistbelt Grassland, Ngongoni Grassland & KZN Sandstone Sourveld (GB–SB) | Grows in sandstone & dolerite-derived soils  | November–March      | Vulnerable                          | <i>LEW Codd</i> 10200 PRE                 | Verdcourt [187]                       | 100 |
| <i>Manulea florifera</i> Hilliard & B.L.Burt<br><br>[Taxon 142]                                                                                                                                   | Scrophulariaceae<br><br>Forb  | Central KZN Midlands (Nottingham Road, Kamberg, Mawaqa/ Bulwer & Mt. Gilboa districts) & | 1200–2200                  | Damp or marshy montane grassland on hillslopes; Mooi River Highland,                                                   | Grows mostly in dolerite-derived soils       | December–April      | Near Threatened                     | <i>OM Hilliard &amp; BL Burt</i> 11251 NU | Hilliard [140]                        | 100 |

| Taxon Name and Authority                                                            | Family and Growth Form    | Distribution                                                                                                                                                                                                                                                            | Elevation Range (m a.s.l.) | Habitat, Vegetation Type(s) and Biome(s)                                                 | Dominant Lithology                          | Flowering Phenology | Red List Status | Reference Voucher               | Taxon Authority Reference(s)        | EI  |
|-------------------------------------------------------------------------------------|---------------------------|-------------------------------------------------------------------------------------------------------------------------------------------------------------------------------------------------------------------------------------------------------------------------|----------------------------|------------------------------------------------------------------------------------------|---------------------------------------------|---------------------|-----------------|---------------------------------|-------------------------------------|-----|
|                                                                                     |                           | southern KZN (Ntsikeni & Mt. Currie districts)                                                                                                                                                                                                                          |                            | Drakensberg Foothill<br>Moist & East<br>Griqualand<br>Grasslands (GB)                    |                                             |                     |                 |                                 |                                     |     |
| <i>Miraglossum pilosum</i><br>(Schltr.) Kupicha<br><br>[Taxon 143]                  | Apocynaceae<br><br>Forb   | KZN Midlands (Dargle, Lions River, Rietvlei, Impendle & Howick districts), south to Ngeli, southern KZN & Ntabamkulu, EC                                                                                                                                                | 900–1800                   | Moist sloping grasslands; Midlands Mistbelt & Drakensberg Foothill Moist Grasslands (GB) | Grows mostly in dolerite-derived soils      | October–January     | Least Concern   | <i>SP Bester 11791</i> PRE      | Scott-Shaw [23]                     | 97  |
| <i>Miraglossum verticillare</i><br>(Schltr.) Kupicha<br><br>[Taxon 144]             | Apocynaceae<br><br>Forb   | Ngome district, northern KZN, to KZN Midlands (Boston, Greytown, Lions River & Rietvlei districts), extending towards foothills of KZN Drakensberg & eastwards towards Inanda, KZN coastal hinterland. Southern outlier recorded from Queenstown district, Eastern Cape | 650–1500                   | Moist sloping grasslands (GB)                                                            | Grows in dolerite & sandstone-derived soils | November–February   | Least Concern   | <i>WT Gerrard 1307</i> K        | Scott-Shaw [23]                     | 99  |
| <i>Moraea graminicola</i><br>Oberm. subsp.<br><i>graminicola</i><br><br>[Taxon 145] | Iridaceae<br><br>Geophyte | Central KZN Midlands (Hilton, Bulwer, Dargle, Mpendle, Nottingham Road & Mooi River districts), westwards to Underberg & a northern outlier at Ngome & southwards to Ngeli                                                                                              | 900–1750                   | Open, moist grassland; Midlands Mistbelt & Drakensberg Foothill Moist Grasslands (GB)    | Grows mostly on dolerite-derived soils      | August–November     | Near Threatened | <i>EE Galpin 9442</i> PRE       | Goldblatt [133];<br>Goldblatt [188] | 100 |
| <i>Moraea hiemalis</i><br>Goldblatt<br><br>[Taxon 146]                              | Iridaceae<br><br>Geophyte | Central KZN Midlands (Hilton, Balgowan, Bulwer, Dargle, Mpendle, Nottingham Road, Mooi                                                                                                                                                                                  | 900–1600                   | Open, moist grassland; Midlands Mistbelt &                                               | Grows mostly on dolerite-derived soils      | July–August         | Vulnerable      | <i>C. Carbutt 31 of 2021</i> NU | Goldblatt [133];<br>Goldblatt [188] | 100 |

| Taxon Name and Authority                               | Family and Growth Form           | Distribution                                                                                                                                                                                                                                                             | Elevation Range (m a.s.l.) | Habitat, Vegetation Type(s) and Biome(s)                                                                                 | Dominant Lithology                     | Flowering Phenology | Red List Status | Reference Voucher             | Taxon Authority Reference(s)         | EI |
|--------------------------------------------------------|----------------------------------|--------------------------------------------------------------------------------------------------------------------------------------------------------------------------------------------------------------------------------------------------------------------------|----------------------------|--------------------------------------------------------------------------------------------------------------------------|----------------------------------------|---------------------|-----------------|-------------------------------|--------------------------------------|----|
|                                                        |                                  | River & Richmond districts) westwards to Underberg                                                                                                                                                                                                                       |                            | Drakensberg Foothill Moist Grasslands (GB)                                                                               |                                        |                     |                 |                               |                                      |    |
| <i>Moraea unibracteata</i><br>Goldblatt<br>[Taxon 147] | Iridaceae<br><br>Geophyte        | Central KZN Midlands (Mpendle, Nottingham Road & Mooi River districts), westwards to central KZN Drakensberg foothills & eastwards to Inanda                                                                                                                             | 600–2000                   | Open, moist grassland on hillslopes; Midlands Mistbelt, Mooi River Highland & Drakensberg Foothill Moist Grasslands (GB) | Grows mostly in dolerite-derived soils | October–November    | Vulnerable      | <i>EE Galpin</i><br>9457 PRE  | Goldblatt [133];<br>Goldblatt [188]  | 98 |
| <i>Nemesia silvatica</i> Hilliard<br>[Taxon 148]       | Scrophulariaceae<br><br>Subshrub | Dundee district (Biggarsberg) to KZN Midlands (Boston, Bulwer, Byrne, Estcourt, Greytown, Karkloof, Impendle & Nottingham Road districts), southwards to Swartberg & Weza districts) & towards foothills of the KZN Drakensberg with an outlier in the Amathole Mtns, EC | 1000–2000                  | Rocky outcrops, slopes & cliffs in moist grasslands & forest edges (GB–FB)                                               | Grows mostly in dolerite-derived soils | December–April      | Least Concern   | <i>OM Hilliard</i><br>18297 K | Hilliard [140]                       | 98 |
| <i>Nerine pancratioides</i><br>Baker<br>[Taxon 149]    | Amaryllidaceae<br><br>Geophyte   | Central KZN Midlands (Dundee, Estcourt, Greytown, Karkloof, Lidgetton, Mt West & Nottingham Road districts), to Ntsikeni in the south & west towards the foothills of the central KZN Drakensberg)                                                                       | 1200–1830                  | Along stream banks of grassy wetlands & seepage areas on east- & south-east facing hillsides (GB)                        | Grows mostly in dolerite-derived soils | February–April      | Near Threatened | <i>JM Wood</i><br>4311 NH     | Norris [189];<br>Duncan et al. [121] | 99 |

| Taxon Name and Authority                                             | Family and Growth Form            | Distribution                                                                                                                                                                                                                                 | Elevation Range (m a.s.l.) | Habitat, Vegetation Type(s) and Biome(s)                                                                                                                  | Dominant Lithology                                               | Flowering Phenology   | Red List Status          | Reference Voucher                                | Taxon Authority Reference(s) | EI  |
|----------------------------------------------------------------------|-----------------------------------|----------------------------------------------------------------------------------------------------------------------------------------------------------------------------------------------------------------------------------------------|----------------------------|-----------------------------------------------------------------------------------------------------------------------------------------------------------|------------------------------------------------------------------|-----------------------|--------------------------|--------------------------------------------------|------------------------------|-----|
| <i>Orbea woodii</i> (N.E.Br.)<br>L.C.Leach<br>[Taxon 150]            | Apocynaceae<br><br>Succulent forb | Middle reaches of the<br>Tugela River Basin in central<br>KZN (Colenso, Estcourt,<br>Helpmekaar, Muden &<br>Weenen districts)                                                                                                                | 700–1200                   | Valley thicket, dry<br>woodland & savanna,<br>on gentle slopes;<br>Thukela Thornveld,<br>Thukela Valley<br>Bushveld, KZN<br>Highland Thornveld<br>(SB–GB) | Grows in<br>shale-derived<br>soils with<br>doleritic<br>outcrops | November–<br>April    | Vulnerable               | <i>West 1531</i><br>PRE                          | Pooley [31];<br>Bruyns [190] | 100 |
| <i>Osteospermum attenuatum</i><br>Hilliard & B.L.Burt<br>[Taxon 151] | Asteraceae<br><br>Forb            | KZN Midlands from Mt.<br>Gilboa/Karkloof (C. Carbutt<br>pers. observ.), southwards<br>to Ntsikeni & Drakensberg<br>foothills (not a<br>“Drakensberg endemic” as<br>suggested)                                                                | 1500–2300                  | Short, open rocky<br>grassland (GB)                                                                                                                       | Grows mostly<br>in dolerite-<br>derived soils                    | November–<br>January  | Rare                     | <i>OM Hilliard<br/>&amp; BL Burt</i><br>15726 NU | Hilliard and<br>Burt [191]   | 98  |
| <i>Pachycarpus acidostelma</i><br>M.Glen & Nicholas<br>[Taxon 152]   | Apocynaceae<br><br>Forb           | Farm Mournapea, Highflats<br>(Ixopo district), central KZN<br>Midlands                                                                                                                                                                       | 860–980                    | Moist grassland on<br>hillslopes; KZN<br>Sandstone Sourveld–<br>Midlands Mistbelt<br>Grassland transition<br>zone (SB–GB)                                 | Grows mostly<br>in sandstone-<br>derived soils                   | November–<br>February | Critically<br>Endangered | <i>C Carbutt 25<br/>of 2016</i> PRE              | Glen et al.<br>[192]         | 100 |
| <i>Pachycarpus natalensis</i><br>N.E.Br.<br>[Taxon 153]              | Apocynaceae<br><br>Forb           | Greytown, Mooi River,<br>Nottingham Road, Boston,<br>Lions River, Cedara, Hilton,<br>Currys Post, Ixopo &<br>Richmond districts, KZN<br>Midlands, eastwards to Cato<br>Ridge & Inanda &<br>southwards to Flagstaff &<br>Elliot districts, EC | 650–1700                   | Rocky grassland on<br>hill slopes & hill tops<br>(GB)                                                                                                     | Grows in<br>dolerite &<br>sandstone-<br>derived soils            | October–<br>December  | Least<br>Concern         | <i>C Carbutt 09<br/>of 2019</i> NU               | Scott-Shaw<br>[23]           | 97  |



| Taxon Name and Authority                                                              | Family and Growth Form         | Distribution                                                                                                                                                                                                                                                                                     | Elevation Range (m a.s.l.) | Habitat, Vegetation Type(s) and Biome(s)                                                                                                                | Dominant Lithology                          | Flowering Phenology | Red List Status | Reference Voucher          | Taxon Authority Reference(s) | EI  |
|---------------------------------------------------------------------------------------|--------------------------------|--------------------------------------------------------------------------------------------------------------------------------------------------------------------------------------------------------------------------------------------------------------------------------------------------|----------------------------|---------------------------------------------------------------------------------------------------------------------------------------------------------|---------------------------------------------|---------------------|-----------------|----------------------------|------------------------------|-----|
| <i>Pearsonia grandifolia</i> (Bolus) Polhill subsp. <i>grandifolia</i><br>[Taxon 154] | Fabaceae<br><br>Prostrate forb | Wakkerstroom district, southern Mpumalanga, to northern KZN (Louwsburg, Ngome, Newcastle, Paulpietersburg & Utrecht districts) & Van Reenen's Pass, to KZN Midlands (Bulwer, Curry's Post, Greytown, Mpendle & Nottingham Road districts), southwards to Ngeli & Weza districts, East Griqualand | 700–1800                   | Rocky outcrops & hillslopes in moist grassland (GB)                                                                                                     | Grows mostly in dolerite-derived soils      | November–February   | Least Concern   | <i>JM Wood</i> 5152 BOL    | Pooley [31]                  | 100 |
| <i>Plectranthus rehmannii</i> Gürke<br>[Taxon 155]                                    | Lamiaceae<br><br>Shrub         | Boston, Karkloof, York & New Hanover districts, southwards to Swartkop Mtn near Hilton, central KZN Midlands                                                                                                                                                                                     | 850–1200                   | Scrubby forest ecotones & streambanks in Mistbelt Forest (FB)                                                                                           | Grows mostly in dolerite-derived soils      | February–June       | Least Concern   | <i>LEW Codd</i> 8587A PRE  | Van Jaarsveld [193]          | 100 |
| <i>Polygala praticola</i> Chodat<br>[Taxon 156]                                       | Polygalaceae<br><br>Forb       | North-western KZN (Utrecht & Newcastle districts), southwards to KZN Midlands (Impendle, Boston & Hermannsburg districts) as far south as Dumisa & westwards to the foothills of the northern KZN Drakensberg                                                                                    | 750–1700                   | Moist mistbelt & montane grasslands on hillslopes; Midlands Mistbelt, Northern KZN Moist, Moist Coast Hinterland & Wakkerstroom Montane Grasslands (GB) | Grows in dolerite & sandstone-derived soils | October–January     | Vulnerable      | <i>JW Bews</i> 1492 NU     | Scott-Shaw [23]              | 99  |
| <i>Phymaspermum pinatifidum</i> (Oliv.) Källersjö                                     | Asteraceae<br><br>Shrub        | Mapumulo, Pietermaritzburg, Noodsberg, New Hanover & Table Mtn districts, central                                                                                                                                                                                                                | 500–950                    | Open sandstone grasslands; KZN Sandstone Sourveld, Moist Coast                                                                                          | Grows in sandstone-derived soils            | August–October      | Vulnerable      | <i>OM Hilliard</i> 3986 NU | Ruiters et al. [194]         | 97  |



| Taxon Name and Authority                                | Family and Growth Form | Distribution                                                                                                                                                                 | Elevation Range (m a.s.l.) | Habitat, Vegetation Type(s) and Biome(s)                                                                                                 | Dominant Lithology                          | Flowering Phenology | Red List Status | Reference Voucher                                | Taxon Authority Reference(s) | EI  |
|---------------------------------------------------------|------------------------|------------------------------------------------------------------------------------------------------------------------------------------------------------------------------|----------------------------|------------------------------------------------------------------------------------------------------------------------------------------|---------------------------------------------|---------------------|-----------------|--------------------------------------------------|------------------------------|-----|
|                                                         |                        | southwards to Ngeli district, East Griqualand, & Mt Ayliff & Baziya Mtn, EC                                                                                                  |                            |                                                                                                                                          |                                             |                     |                 |                                                  |                              |     |
| <i>Senecio byrnensis</i> Hilliard<br>[Taxon 163]        | Asteraceae<br>Forb     | Byrne, Richmond district, extending northwards to Qudeni & Ncandu (Newcastle) districts & a southern outlier at Baziya Mtn, EC                                               | 1100–1800                  | Partly shaded, damp sites in forest–grassland ecotones & grassy slopes & hilltops above forest patches (FB–GB)                           | Grows in dolerite-derived soils             | February–April      | Least Concern   | <i>OM Hilliard 8086</i> NU                       | Hilliard [195]               | 100 |
| <i>Senecio exuberans</i> R.A.Dyer<br>[Taxon 164]        | Asteraceae<br>Forb     | Hilton & Pietermaritzburg districts, KZN Midlands, to Cato Ridge & Hammarsdale districts, towards Drummond, southwards to Mid Illovo                                         | 750–1000                   | Mostly sandstone grasslands; KZN Sandstone Sourveld, Moist Coast Hinterland, Dry Coast Hinterland & Midlands Mistbelt Grasslands (SB–GB) | Grows in dolerite & sandstone-derived soils | December–January    | Endangered      | <i>RA Dyer 4116</i> PRE                          | Hilliard [128]               | 100 |
| <i>Senecio hirsutilobus</i> Hilliard<br>[Taxon 165]     | Asteraceae<br>Forb     | Impendle, Lions River & Ixopo districts, KZN Midlands, towards the foothills of the KZN Drakensberg & southwards to East Griqualand (Ngeli Mtn) & Mt. Engcobo, EC            | 1200–1800                  | Moist grassland on gentle to steep hillslopes (GB)                                                                                       | Grows in dolerite & sandstone-derived soils | November–January    | Least Concern   | <i>C Carbutt &amp; JD Craigie 05 of 2011</i> PRE | Hilliard [128]               | 98  |
| <i>Sisyranthus trichostomus</i> K.Schum.<br>[Taxon 166] | Apocynaceae<br>Forb    | Central KZN Midlands (Greytown, Rietvlei, Howick, Boston, Dargle, Mpendle, Richmond, Ixopo & Pietermaritzburg districts), southwards to Harding & Weza districts & Ngeli Mtn | 700–1600                   | Moist grassland; Midlands Mistbelt & Drakensberg Foothill Moist Grasslands (GB)                                                          | Grows mostly in dolerite-derived soils      | October–January     | Least Concern   | <i>NE Shirley 343</i> NU                         | Scott-Shaw [23]              | 100 |

| Taxon Name and Authority                                                                         | Family and Growth Form                          | Distribution                                                                                                                                                 | Elevation Range (m a.s.l.) | Habitat, Vegetation Type(s) and Biome(s)                                                                                                   | Dominant Lithology                           | Flowering Phenology | Red List Status                           | Reference Voucher             | Taxon Authority Reference(s) | EI  |
|--------------------------------------------------------------------------------------------------|-------------------------------------------------|--------------------------------------------------------------------------------------------------------------------------------------------------------------|----------------------------|--------------------------------------------------------------------------------------------------------------------------------------------|----------------------------------------------|---------------------|-------------------------------------------|-------------------------------|------------------------------|-----|
| <i>Stachys rivularis</i><br>J.M.Wood & M.S.Evans<br><br>[Taxon 167]                              | Lamiaceae<br><br>Forb                           | Utrecht & Dannhauser districts, north-western KZN, to Mooi River & Lions River districts, central KZN Midlands                                               | 1300–1700                  | Montane grassland on hillslopes; Wakkerstroom Montane & Midlands Mistbelt Grasslands (GB)                                                  | Grows mostly in dolerite-derived soils       | November–February   | Data Deficient – Insufficient Information | <i>JM Wood</i><br>6252A NH    | Scott-Shaw [23]              | 100 |
| <i>Streptocarpus cooksonii</i><br>B.L.Burt<br><br>[Taxon 168]                                    | Gesneriaceae<br><br>Epiphytic herb (lithophyte) | Nkandla to Jameson’s Drift, Kranskop, Colenso & Muden districts, central KZN (Tugela & Buffalo River Basins)                                                 | 850–1200                   | Cliff faces in hot, dry valleys & rocky outcrops on hillslopes of open grassland; Thukela Valley Bushveld & KZN Highland Thornveld (SB–GB) | Grows mostly on sandstone cliffs & boulders  | December–April      | Least Concern                             | <i>RG Strey</i><br>9310 PRE   | Scott-Shaw [23]              | 100 |
| <i>Streptocarpus fanminiae</i><br>Harv. ex C.B.Clarke<br><br>[Taxon 169]                         | Gesneriaceae<br><br>Epiphytic herb (lithophyte) | Vryheid, Ngome, Nkandla & Qudeni districts, northern KZN, to central KZN Midlands (Ixopo, Karkloof, Dargle, Kranskop & Noodsberg districts)                  | 900–1500                   | Near waterfalls, streambanks & damp rock faces in forest & shaded grassland (FB–GB)                                                        | Grows mostly in dolerite-derived soils       | November–April      | Least Concern                             | <i>JM Wood</i><br>4234 NH     | Scott-Shaw [23]              | 100 |
| <i>Streptocarpus floribundus</i><br>Weigend & T.J.Edwards<br><br>[Taxon 170]                     | Gesneriaceae<br><br>Epiphytic herb (lithophyte) | Kranskop district, KZN Midlands                                                                                                                              | 900–1100                   | Scarp forest, on doleritic cliffs (FB)                                                                                                     | Grows in dolerite-derived soils              | November–December   | Vulnerable                                | <i>OM Hilliard</i><br>1929 NU | Weigand and Edwards [196]    | 100 |
| <i>Streptocarpus polyanthus</i><br>Hook. subsp. <i>verecundus</i><br>Hilliard<br><br>[Taxon 171] | Gesneriaceae<br><br>Epiphytic herb (lithophyte) | Ngome district, northern KZN, to KZN Midlands (New Hanover, Kranskop, Noodsberg & Rietvlei districts), to Ndwedwe, Dumisa & Inchanga, KZN coastal hinterland | 700–1200                   | Under rocks of hill summits, rocky outcrops, earth banks & steep slopes, in damp & shady micro-environments (GB)                           | Grows mostly on sandstone-derived substrates | November–January    | Least Concern                             | <i>OM Hilliard</i><br>2064 E  | Scott-Shaw [23]              | 100 |

| Taxon Name and Authority                                                                                          | Family and Growth Form                          | Distribution                                                                                                                                                                                                            | Elevation Range (m a.s.l.) | Habitat, Vegetation Type(s) and Biome(s)                                                                                                    | Dominant Lithology                                  | Flowering Phenology | Red List Status | Reference Voucher             | Taxon Authority Reference(s) | EI  |
|-------------------------------------------------------------------------------------------------------------------|-------------------------------------------------|-------------------------------------------------------------------------------------------------------------------------------------------------------------------------------------------------------------------------|----------------------------|---------------------------------------------------------------------------------------------------------------------------------------------|-----------------------------------------------------|---------------------|-----------------|-------------------------------|------------------------------|-----|
| <i>Streptocarpus silvaticus</i><br>Hilliard<br>[Taxon 172]                                                        | Gesneriaceae<br><br>Epiphytic herb (lithophyte) | KZN Midlands (Greytown, Creighton, Dargle, Donnybrook, Karkloof, Lions River, Pietermaritzburg & Richmond districts), southwards to Ntsikeni & Ngeli, East Griqualand                                                   | 900–1800                   | Epiphyte on tree trunks & rocks in forest (FB)                                                                                              | Grows on dolerite-derived substrates                | October–January     | Least Concern   | <i>OM Hilliard</i><br>811 K   | Scott-Shaw [23]              | 100 |
| <i>Syncolostemon latidens</i><br>(N.E.Br.) Codd<br>[Taxon 173]                                                    | Lamiaceae<br><br>Shrub                          | Greytown (Umvoti) to Kranskop districts, KZN Midlands                                                                                                                                                                   | 900–1100                   | Rocky grassland, often bordering forest or thornveld; Eastern Valley Bushveld, Thukela Valley Bushveld, Midlands Mistbelt Grassland (SB–GB) | Grows in sandstone-derived soils of the Natal Group | March–May           | Vulnerable      | <i>WT Gerrard</i><br>1233 K   | Codd [145]                   | 100 |
| <i>Tephrosia natalensis</i><br>H.M.L.Forbes subsp. <i>pseudocapitata</i><br>(H.M.L.Forbes) Schrire<br>[Taxon 174] | Fabaceae<br><br>Forb                            | Greytown, Kranskop & Muden districts, central KZN Midlands, with a northern outpost in the Piet Retief district, southern Mpumalanga & Vryheid, northern KZN, also extending south to the Highflats & Kokstad districts | 900–1400                   | Open grassland on hillslopes; Paulpietersburg Moist, Wakkerstroom Montane, Midlands Mistbelt & East Griqualand Grasslands (GB)              | Grows in dolerite & sandstone-derived soils         | November–January    | Endangered      | <i>CH Stirton</i><br>5203 PRE | Schrire [197]                | 100 |
| <i>Thunbergia venosa</i><br>C.B.Clarke<br>[Taxon 175]                                                             | Acanthaceae<br><br>Forb                         | Estcourt, Weenen, Greytown, Richmond, Bulwer, Howick & Pietermaritzburg districts, central KZN Midlands, eastwards to Hammarsdale                                                                                       | 500–1400                   | Open grassland & wooded grassland (GB)                                                                                                      | Grows in dolerite & sandstone-derived soils         | September–April     | Rare            | <i>JM Wood</i> 643 PRE        | Retief and Reyneke [198]     | 99  |

| Taxon Name and Authority                                                      | Family and Growth Form    | Distribution                                                                                                                                     | Elevation Range (m a.s.l.) | Habitat, Vegetation Type(s) and Biome(s)                                                                                                    | Dominant Lithology                     | Flowering Phenology    | Red List Status             | Reference Voucher                                    | Taxon Authority Reference(s)                             | EI  |
|-------------------------------------------------------------------------------|---------------------------|--------------------------------------------------------------------------------------------------------------------------------------------------|----------------------------|---------------------------------------------------------------------------------------------------------------------------------------------|----------------------------------------|------------------------|-----------------------------|------------------------------------------------------|----------------------------------------------------------|-----|
|                                                                               |                           | & Inanda, extending southwards to Ngeli Mtn, southern KZN                                                                                        |                            |                                                                                                                                             |                                        |                        |                             |                                                      |                                                          |     |
| <i>Vitellariopsis dispar</i> (N.E.Br.) Aubrév.<br><br>[Taxon 176]             | Sapotaceae<br><br>Tree    | Upper & central Tugela River Basin, central KZN                                                                                                  | 800–1200                   | Closed woodland & dry riverine forest, along drainage lines & watercourses (SB–FB)                                                          | Grows mostly in shale-derived soils    | October–November (May) | Rare                        | <i>JM Wood</i><br><i>4472</i> K                      | Boon [32]                                                | 100 |
| <i>Wahlenbergia pallidiflora</i> Hilliard & B.L.Burt<br><br>[Taxon 177]       | Campanulaceae<br><br>Forb | Mt. Gilboa (Karkloof district), Lions River & Nottingham Road districts, central KZN Midlands, extending to foothills of central KZN Drakensberg | 1500–1900                  | Edges of wetlands & streams in rocky montane grassland; Midlands Mistbelt, Mooi River Highland & Drakensberg Foothill Moist Grasslands (GB) | Grows mostly in dolerite-derived soils | December–January       | Least Concern               | <i>OM Hilliard &amp; BL Burt</i><br><i>11883</i> NU  | Scott-Shaw [23]                                          | 98  |
| <i>Watsonia canaliculata</i> Goldblatt<br><br>[Taxon 178]                     | Iridaceae<br><br>Geophyte | Greytown, New Hanover, Karkloof & Howick districts, KZN Midlands                                                                                 | 1000–1600                  | Open rocky grassland; Midlands Mistbelt & Mooi River Highland Grasslands (GB)                                                               | Grows in dolerite-derived soils        | November–January       | Endangered                  | <i>P Goldblatt &amp; J Manning</i><br><i>8357</i> NU | Goldblatt [1999]                                         | 100 |
| <i>Watsonia vicschuettei</i> C.J. Potgieter & I.M. Johnson<br><br>[Taxon 179] | Iridaceae<br><br>Geophyte | Western shoreline of Lake Merthley, Greytown (Umvoti) district, KZN Midlands                                                                     | 1040–1350                  | Seasonal grassy wetlands (GB)                                                                                                               | Grows in dolerite-derived soils        | February–March         | Unknown (not yet evaluated) | <i>IM Johnson</i><br><i>1487</i> NBG                 | Goldblatt and Manning [200]; Potgieter and Johnson [201] | 100 |
| <i>Woodia verruculosa</i> Schltr.<br><br>[Taxon 180]                          | Apocynaceae<br><br>Forb   | Howick, Ixopo & Pietermaritzburg districts, KZN Midlands, eastwards to Camperdown district, southwards to Clydesdale (Umzimkulu district)        | 700–1300                   | Mistbelt & Ngongoni grassland; Midlands Mistbelt, Dry Coast Hinterland & Southern KZN Moist Grasslands (GB)                                 | Grows in dolerite-derived soils        | October–December       | Vulnerable                  | <i>BM</i><br><i>Brayshaw 70</i> NU                   | Scott-Shaw [23]                                          | 100 |
| <i>Xysmalobium gerrardii</i> Scott-Elliot                                     | Apocynaceae               | Ngome & Qudeni, northern KZN, to KZN Midlands                                                                                                    | 600–1500                   | Moist grassland (GB)                                                                                                                        | Grows in dolerite &                    | October–January        | Least Concern               | <i>TJ Edwards</i><br><i>446</i> NU                   | Scott-Shaw [23]                                          | 98  |



| Taxon Name and Authority                                                   | Family and Growth Form | Distribution                                                                                                                                                                             | Elevation Range (m a.s.l.) | Habitat, Vegetation Type(s) and Biome(s)                                                                                                   | Dominant Lithology                                  | Flowering Phenology | Red List Status                          | Reference Voucher                         | Taxon Authority Reference(s)    | EI  |
|----------------------------------------------------------------------------|------------------------|------------------------------------------------------------------------------------------------------------------------------------------------------------------------------------------|----------------------------|--------------------------------------------------------------------------------------------------------------------------------------------|-----------------------------------------------------|---------------------|------------------------------------------|-------------------------------------------|---------------------------------|-----|
| <i>Berkheya caffra</i> MacOwan<br>[Taxon 186]                              | Asteraceae<br>Forb     | Clydesdale district, southern KZN                                                                                                                                                        | 1100–1300                  | Mistbelt grassland (GB)                                                                                                                    | Grows mostly in dolerite-derived soils              | November–March      | Data Deficient – Taxon’ly Problematic    | <i>W Tyson</i> 2755 BM                    | Scott-Shaw [23]                 | 100 |
| <i>Berkheya griquana</i> Hilliard & B.L.Burt<br>[Taxon 187]                | Asteraceae<br>Forb     | Kokstad & Mt. Currie districts, East Griqualand, southern KZN                                                                                                                            | 1400–1700                  | Undulating montane grassland; East Griqualand Grassland (GB)                                                                               | Grows in dolerite-derived soils                     | December–January    | Vulnerable                               | <i>OM Hilliard &amp; BL Burt</i> 14867 NU | Hilliard and Burt [203]         | 100 |
| <i>Ceropegia molaventi</i> (Peckover & A.E. van Wyk) Bruyns<br>[Taxon 188] | Apocynaceae<br>Forb    | Ngeli Mtn, Ntsikeni & Umzimkulu districts, southern KZN                                                                                                                                  | 1350–1750                  | Amongst rocky outcrops & edges of rock sheets in short, moist grassland; Dry Coast Hinterland & Drakensberg Foothill Moist Grasslands (GB) | Grows in dolerite & gabbro-derived soils            | November–February   | Vulnerable                               | <i>AE Van Wyk</i> 12483 PRU               | Peckover and Van Wyk [204]      | 100 |
| <i>Ceropegia rudatisii</i> Schltr.<br>[Taxon 189]                          | Apocynaceae<br>Forb    | Umzinto, Dumisa & Highflats, southern KZN coastal hinterland escarpment                                                                                                                  | 680–800                    | Rocky outcrops & bush clump margins in Ngongoni grassland; KZN Sandstone Sourveld (SB)                                                     | Grows in sandstone-derived soils of the Natal Group | November–February   | Critically Endangered (Possibly Extinct) | <i>DGA Styles &amp; A Heiduk</i> 5770 NU  | Dyer [163]; Heiduk et al. [205] | 100 |
| <i>Craterocapsa insizwae</i> (Zahlbr.) Hilliard & B.L.Burt<br>[Taxon 190]  | Campanulaceae<br>Forb  | Hella-Hella (Highover), Richmond district, southwards to Ixopo & Umzimkulu districts & Mt. Currie, Ngeli Mtn & Weza (Kokstad district), East Griqualand, southern KZN to Mt. Insizwa, EC | 1100–1600                  | Mistbelt & montane grasslands; Drakensberg Foothill Moist Grassland (GB)                                                                   | Grows in dolerite & gabbro-derived soils            | November–March      | Least Concern                            | <i>BD Schrire</i> 953 NU                  | Hilliard and Burt [206]         | 100 |



| Taxon Name and Authority                                     | Family and Growth Form         | Distribution                                                                                                                         | Elevation Range (m a.s.l.) | Habitat, Vegetation Type(s) and Biome(s)                                                                                                         | Dominant Lithology                                   | Flowering Phenology | Red List Status | Reference Voucher               | Taxon Authority Reference(s) | EI  |
|--------------------------------------------------------------|--------------------------------|--------------------------------------------------------------------------------------------------------------------------------------|----------------------------|--------------------------------------------------------------------------------------------------------------------------------------------------|------------------------------------------------------|---------------------|-----------------|---------------------------------|------------------------------|-----|
| <i>Cymbopappus hilliardiae</i><br>B.Nord.<br><br>[Taxon 191] | Asteraceae<br><br>Shrub        | Mt. Insizwa, Ayliff district, Eastern Cape midlands                                                                                  | 1450–1600                  | Rocky slopes in moist grassland; Drakensberg Foothill Moist Grassland (GB)                                                                       | Grows in dolerite & gabbro-derived soils             | September–January   | Vulnerable      | OM Hilliard & BL Burtt 7289 E   | Nordenstam [207]             | 100 |
| <i>Cyrtanthus rotundilobus</i><br>N.E.Br.<br><br>[Taxon 192] | Amaryllidaceae<br><br>Geophyte | Mt. Currie & Franklin districts, East Griqualand, southern KZN, to north-eastern Eastern Cape midlands (Mt. Fletcher, Elliot & Ugie) | 1400–2200                  | Streambanks & clifftops in montane grassland (GB)                                                                                                | Grows in dolerite & sandstone-derived soils & cliffs | December–January    | Least Concern   | LE Taylor 5531 PRE              | Duncan et al. [121]          | 100 |
| <i>Dierama ambiguum</i><br>Hilliard<br><br>[Taxon 193]       | Iridaceae<br><br>Geophyte      | Ngeli Mtn, Weza & Ntsikeni in East Griqualand, southern KZN to Mt. Insizwa & Maclear districts, Eastern Cape Midlands                | 1200–1900                  | Open montane grassland; Midlands Mistbelt & Drakensberg Foothill Moist Grasslands (GB)                                                           | Grows in dolerite & gabbro-derived soils             | October–February    | Endangered      | SP Bester 1740 PRE              | Hilliard and Burtt [123]     | 100 |
| <i>Dierama tysonii</i> N.E.Br.<br><br>[Taxon 194]            | Iridaceae<br><br>Geophyte      | Cedarville, Mt. Currie, Franklin, Swartberg & Weza districts, East Griqualand, southern KZN                                          | 1300–1800                  | Montane grassland; Midlands Mistbelt, East Griqualand & Drakensberg Foothill Moist Grasslands (GB)                                               | Grows mostly in dolerite-derived soils               | September–February  | Vulnerable      | OM Hilliard & BL Burtt 13969 NU | Hilliard and Burtt [123]     | 100 |
| <i>Dioscorea brownii</i> Schinz<br><br>[Taxon 195]           | Dioscoreaceae<br><br>Forb      | Richmond district southwards to Ngeli Mtn, southern KZN                                                                              | 900–1450                   | Rank mistbelt & montane grasslands, along forest margins; Midlands Mistbelt, Moist Coast Hinterland & Drakensberg Foothill Moist Grasslands (GB) | Grows mostly in dolerite-derived soils               | November–March      | Endangered      | W Tyson 1829 SAM                | Hilliard and Burtt [208]     | 99  |
| <i>Disa scullyi</i> Bolus<br><br>[Taxon 196]                 | Orchidaceae<br><br>Forb        | Mooi River & upper Dargle/Impendle districts, KZN Midlands, to Ntsikeni & southern KZN foothills                                     | 1500–2400                  | Grassy tussocked wetlands, seepages, or stream edges in montane grassland;                                                                       | Grows mostly in dolerite-derived soils               | December–January    | Endangered      | C Carbutt 05 of 2018 NU         | Johnson and Bytebier [130]   | 97  |

| Taxon Name and Authority                                                               | Family and Growth Form | Distribution                                                                                                                            | Elevation Range (m a.s.l.) | Habitat, Vegetation Type(s) and Biome(s)                                                            | Dominant Lithology                       | Flowering Phenology | Red List Status | Reference Voucher           | Taxon Authority Reference(s)  | EI |
|----------------------------------------------------------------------------------------|------------------------|-----------------------------------------------------------------------------------------------------------------------------------------|----------------------------|-----------------------------------------------------------------------------------------------------|------------------------------------------|---------------------|-----------------|-----------------------------|-------------------------------|----|
|                                                                                        |                        | southwards to the Eastern Cape Midlands & Amatole Mtns                                                                                  |                            | Mooi River Highland, East Griqualand, Drakensberg Foothill Moist & Amathole Montane Grasslands (GB) |                                          |                     |                 |                             |                               |    |
| <i>Encephalartos friderici-guilielmi</i> Lehm.<br>[Taxon 197]                          | Zamiaceae<br>Cycad     | Kokstad district, East Griqualand, southern KZN, southwards to Queenstown & Cathcart districts, EC                                      | 800–1400                   | Rocky outcrops & cliff edges in montane grassland & shrubland (GB)                                  | Grows mostly in dolerite-derived soils   | September–March     | Near Threatened | <i>JPH Acocks</i> 10999 PRE | Boon [32]; Kemp [209]         | 98 |
| <i>Erica cooperi</i> Bolus var. <i>cooperi</i><br>[Taxon 198]                          | Ericaceae<br>Shrub     | Boston, Byrne, Karkloof & Lions River districts, central KZN Midlands, southwards to Maclear, Elliot & Lady Frere, EC                   | 900–2300                   | Seepage areas on sloping grasslands & stream edges (GB)                                             | Grows mostly in dolerite-derived soils   | January–July        | Rare            | <i>FB Wright</i> 1510 PRE   | Scott-Shaw [23]               | 97 |
| <i>Erica tysonii</i> Bolus var. <i>tysonii</i><br>[Taxon 199]                          | Ericaceae<br>Shrub     | Foothills of the Drakensberg near Underberg southwards to Kokstad district & Ngeli Mtn & Mt. Insizwa, to Maclear & Elliot districts, EC | 1700–2200                  | Mountain slopes & cliff faces in montane grassland (GB)                                             | Grows in dolerite & basalt-derived soils | January–March       | Least Concern   | <i>W Tyson</i> 1290 PRE     | Scott-Shaw [23]               | 98 |
| <i>Eriosema populifolium</i> Benth. ex Harv. subsp. <i>populifolium</i><br>[Taxon 200] | Fabaceae<br>Forb       | Umlaas Road to Mid Illovo, Dumisa, Highflats, Hlutankungu & Jolivet districts, southern KZN Midlands                                    | 500–900                    | Moist grassland; KZN Sandstone Sourveld & Dry Coast Hinterland Grassland (SB–GB)                    | Grows mostly in sandstone-derived soils  | October–November    | Endangered      | <i>CH Stirton</i> 1213 PRE  | Stirton and Gordon-Gray [210] | 98 |
| <i>Gnaphalium griquense</i> Hilliard & B.L.Burt<br>[Taxon 201]                         | Asteraceae<br>Forb     | Franklin, Ntsikeni & Cedarville districts, East Griqualand, southern KZN, with an outlying population at Sehlabathebe NP in Lesotho     | 1200–2500                  | Moist grassland in damp places (GB)                                                                 | Grows mostly in dolerite-derived soils   | November–February   | Rare            | <i>OM Hilliard</i> 2076 NU  | Hilliard [211]                | 99 |

| Taxon Name and Authority                                                          | Family and Growth Form           | Distribution                                                                                                                    | Elevation Range (m a.s.l.) | Habitat, Vegetation Type(s) and Biome(s)                                                                               | Dominant Lithology                          | Flowering Phenology   | Red List Status                           | Reference Voucher                       | Taxon Authority Reference(s) | EI  |
|-----------------------------------------------------------------------------------|----------------------------------|---------------------------------------------------------------------------------------------------------------------------------|----------------------------|------------------------------------------------------------------------------------------------------------------------|---------------------------------------------|-----------------------|-------------------------------------------|-----------------------------------------|------------------------------|-----|
| <i>Helichrysum tenax</i><br>M.D.Hend. var. <i>pallidum</i><br>Hilliard & B.L.Burt | Asteraceae<br><br>Subshrub       | Ngeli Mtn & Weza district, southern KZN, to<br>Tabankulu & Mt. Insizwa, EC                                                      | 1300–1700                  | Rock crevices in cliff faces & steep, rocky sloping terrain in montane grassland (GB)                                  | Grows in dolerite & gabbro-derived soils    | October–November      | Rare                                      | OM Hilliard & BL Burt<br>7336 NU        | Hilliard [128]               | 100 |
| [Taxon 202]                                                                       |                                  |                                                                                                                                 |                            |                                                                                                                        |                                             |                       |                                           |                                         |                              |     |
| <i>Hesperantha ingeliensis</i><br>Hilliard & B.L.Burt                             | Iridaceae<br><br>Geophyte        | Ngeli Mtn, East Griqualand, southern KZN, to Mjika Mtn, Eastern Cape midlands                                                   | 1400–1800                  | Damp cliff crevices or rocky outcrops in montane grassland (GB)                                                        | Grows in gabbro-derived soils               | January–March         | Rare                                      | OM Hilliard & BL Burt<br>5838 NU        | Scott-Shaw [23]              | 99  |
| [Taxon 203]                                                                       |                                  |                                                                                                                                 |                            |                                                                                                                        |                                             |                       |                                           |                                         |                              |     |
| <i>Lessertia ingeliensis</i><br>M.Balkwill                                        | Fabaceae<br><br>Forb             | Ngeli Mtn, East Griqualand, southern KZN                                                                                        | 1800–2200                  | Moist rocky grassland (GB)                                                                                             | Grows in gabbro-derived soils               | December–February     | Least Concern                             | K Balkwill & MJ Cadman<br>2670 NU       | Balkwill and Balkwill [212]  | 100 |
| [Taxon 204]                                                                       |                                  |                                                                                                                                 |                            |                                                                                                                        |                                             |                       |                                           |                                         |                              |     |
| <i>Phylca tysonii</i> Pillans<br>var. <i>tysonii</i>                              | Rhamnaceae<br><br>Subshrub–shrub | Ngeli Mtn, East Griqualand, southern KZN                                                                                        | 1900–2200                  | Rocky outcrops of mountain summit (plateau) (GB)                                                                       | Grows in gabbro-derived soils               | July (?)              | Data Deficient – Insufficient Information | W Tyson<br>1442 PRE                     | Pillans [213]                | 100 |
| [Taxon 205]                                                                       |                                  |                                                                                                                                 |                            |                                                                                                                        |                                             |                       |                                           |                                         |                              |     |
| <i>Satyrium rhodanthum</i><br>Schltr.                                             | Orchidaceae<br><br>Forb          | Ixopo, Highflats, Hlutankungu & Jolivet districts, southern KZN                                                                 | 700–1100                   | Moist, sloping rocky grassland; Midlands Mistbelt & Moist Coast Hinterland Grasslands & KZN Sandstone Sourveld (GB–SB) | Grows in dolerite & sandstone-derived soils | Late October–December | Endangered                                | C Carbutt & JD Craigie 02<br>of 2013 NU | Johnson and Bytebier [130]   | 100 |
| [Taxon 206]                                                                       |                                  |                                                                                                                                 |                            |                                                                                                                        |                                             |                       |                                           |                                         |                              |     |
| <i>Schizoglossum bidens</i><br>E.Mey. subsp. <i>hirtum</i><br>Kupicha             | Apocynaceae<br><br>Forb          | Boston, Lions River (Mt. Ashley) & Donnybrook districts, KZN Midlands, to Coleford NR & Ntsikeni, East Griqualand, southern KZN | 1050–1700                  | Moist grassland on hill slopes; Midlands Mistbelt & Drakensberg Foothill Moist Grasslands (GB)                         | Grows mostly in dolerite-derived soils      | October–December      | Endangered                                | EJ Moll 1329<br>NU                      | Kupicha [110]                | 100 |
| [Taxon 207]                                                                       |                                  |                                                                                                                                 |                            |                                                                                                                        |                                             |                       |                                           |                                         |                              |     |

| Taxon Name and Authority                                 | Family and Growth Form    | Distribution                                                                                                                                  | Elevation Range (m a.s.l.) | Habitat, Vegetation Type(s) and Biome(s)                                                                               | Dominant Lithology                          | Flowering Phenology | Red List Status                           | Reference Voucher                         | Taxon Authority Reference(s) | EI  |
|----------------------------------------------------------|---------------------------|-----------------------------------------------------------------------------------------------------------------------------------------------|----------------------------|------------------------------------------------------------------------------------------------------------------------|---------------------------------------------|---------------------|-------------------------------------------|-------------------------------------------|------------------------------|-----|
| <i>Schizoglossum quadridens</i> N.E.Br.<br>[Taxon 208]   | Apocynaceae<br>Forb       | “The Plateau,” East Griqualand, southern KZN                                                                                                  | Unknown                    | East Griqualand Grassland (GB)                                                                                         | Unknown                                     | January             | Data Deficient – Insufficient Information | <i>JM Wood 4189</i> NH                    | Kupicha [110]                | 100 |
| <i>Schizoglossum rubiginosum</i> Hilliard<br>[Taxon 209] | Apocynaceae<br>Forb       | Harding district, southern KZN                                                                                                                | 800–1000                   | Mistbelt grassland; Moist Coast Hinterland Grassland (GB)                                                              | Grows in dolerite-derived soils             | February–March      | Vulnerable                                | <i>OM Hilliard &amp; BL Burt</i> 16723 E  | Hilliard and Burt [111]      | 100 |
| <i>Schizoglossum singulare</i> Kupicha<br>[Taxon 210]    | Apocynaceae<br>Forb       | Ngeli Mtn, East Griqualand, southern KZN                                                                                                      | 1900–2100                  | Montane grassland; Drakensberg Foothill Moist Grassland (GB)                                                           | Grows in gabbro-derived soils               | December–January    | Vulnerable                                | <i>OM Hilliard &amp; BL Burt</i> 5816 NU  | Kupicha [110]                | 100 |
| <i>Searsia rudatisii</i> (Engl.) Moffett<br>[Taxon 211]  | Anacardiaceae<br>Subshrub | Richmond (Hella-Hella), Dumisa, Ixopo & Highflats districts, southern KZN, extending coastwards to Vernon Crookes Nature Reserve near Umzinto | (400)<br>600–1100          | Sloping grasslands & outcrops; Southern KZN Moist & Moist Coast Hinterland Grasslands & KZN Sandstone Sourveld (GB–SB) | Grows in dolerite & sandstone-derived soils | September–January   | Endangered                                | <i>RO Moffett</i> 3525 PRE                | Boon [32]; Moffett [139]     | 99  |
| <i>Selago foliosa</i> Rolfe<br>[Taxon 212]               | Scrophulariaceae<br>Forb  | Hella-Hella (Highover), Richmond district, southwards to Clydesdale, Umzimkulu district, southern KZN                                         | 900–1200                   | Sloping grasslands; Midlands Mistbelt Grassland (GB)                                                                   | Grows in dolerite-derived soils             | March–April         | Least Concern                             | <i>W Tyson</i> 2523 K                     | Hilliard [140]               | 100 |
| <i>Selago griquana</i> Hilliard<br>[Taxon 213]           | Scrophulariaceae<br>Forb  | Between Cedarville, Swartberg & Mt. Currie, Kokstad district, East Griqualand, southern KZN                                                   | 1400–1600                  | Open grassland; East Griqualand Grassland (GB)                                                                         | Grows in dolerite-derived soils             | December–January    | Data Deficient – Insufficient Information | <i>OM Hilliard &amp; BL Burt</i> 18918 NU | Hilliard [140]               | 100 |
| <i>Senecio poseideonis</i> Hilliard & B.L.Burt           | Asteraceae<br>Forb        | Qudeni Forest (Nkandla district) southwards to Ngeli                                                                                          | 800–1600                   | Streamsides & damp shaded banks in forest & forest margins (FB)                                                        | Grows in dolerite &                         | December–January    | Rare                                      | <i>OM Hilliard &amp; BL Burt</i> 5850 NU  | Hilliard [128]               | 100 |



| Taxon Name and Authority                                              | Family and Growth Form  | Distribution                                                                                                                                                                                                | Elevation Range (m a.s.l.) | Habitat, Vegetation Type(s) and Biome(s)                                                            | Dominant Lithology                     | Flowering Phenology | Red List Status | Reference Voucher             | Taxon Authority Reference(s) | EI |
|-----------------------------------------------------------------------|-------------------------|-------------------------------------------------------------------------------------------------------------------------------------------------------------------------------------------------------------|----------------------------|-----------------------------------------------------------------------------------------------------|----------------------------------------|---------------------|-----------------|-------------------------------|------------------------------|----|
| <i>Xysmalobium tysonianum</i><br>(Schltr.) N.E.Br.<br><br>[Taxon 220] | Apocynaceae<br><br>Forb | Ngeli Mtn, Ntsikeni, Weza, Mt. Currie, Kokstad districts, East Griqualand, southern KZN, with a northern outlier at Ngotshe, Nongoma district, northern KZN & a southern outlier in the Elliot district, EC | 1100–2100                  | Rocky hillslopes in montane grassland; Drakensberg Foothill Moist & East Griqualand Grasslands (GB) | Grows mostly in dolerite-derived soils | November–January    | Least Concern   | <i>SP Bester</i><br>11660 PRE | Scott-Shaw [23]              | 99 |

**Table S2.** Examples of extra-limital plant taxa not recognized as GMC endemics. Taxa are arranged alphabetically according to four phylogeographic affiliations (columns 1–4) and a cohort of taxa without any discernible distributional patterns (column 5). Many taxa in columns 2–3 could be considered GMC near-endemics.

| DMC Near-Endemics <sup>1</sup>                                                             | Limpopo–Mpumalanga–Eswatini Connections <sup>2</sup>                       | Coastal Affinities <sup>3</sup>                                                                    | Eastern Cape Endemics <sup>4</sup>                                                                                                     | General Poor Fit <sup>5</sup>                                                          |
|--------------------------------------------------------------------------------------------|----------------------------------------------------------------------------|----------------------------------------------------------------------------------------------------|----------------------------------------------------------------------------------------------------------------------------------------|----------------------------------------------------------------------------------------|
| <i>Afrotysonia africana</i> (Bolus)<br>Rauschert (Boraginaceae)                            | <i>Acrotome thorncroftii</i> Skan<br>(Lamiaceae)                           | <i>Agathisanthemum chlorophyllum</i> (Hochst.)<br>Bremek. var. <i>chlorophyllum</i><br>(Rubiaceae) | <i>Ceropegia meyeriana</i> (Schltr.)<br>Bruyns (Apocynaceae) (Katberg,<br>Amathole Mtns & King William's<br>Town to Komga)             | <i>Annesorhiza schlechteri</i><br>H.Wolff (Apiaceae)                                   |
| <i>A. glochidiata</i> (R.R.Mill)<br>R.R.Mill (Boraginaceae)                                | <i>Adenanthellum osmitoides</i><br>(Harv.) B.Nord.<br>(Asteraceae)         | <i>Aloe kraussii</i> Baker<br>(Asphodelaceae)                                                      | <i>C. micriflora</i> Bruyns<br>(Apocynaceae) (Queenstown)                                                                              | <i>Argyrobium baptisioides</i><br>(E.Mey.) Walp. (Fabaceae)                            |
| <i>Albuca humilis</i> Baker<br>(Hyacinthaceae)                                             | <i>Aloe dewetii</i> Reynolds<br>(Asphodelaceae)                            | <i>A. linearifolia</i> A.Berger<br>(Asphodelaceae)                                                 | <i>C. montiphila</i> Bruyns<br>(Apocynaceae) (Queenstown)                                                                              | <i>A. marginatum</i> Bolus<br>(Fabaceae)                                               |
| <i>Alepidea woodii</i> Oliv.<br>(Apiaceae)                                                 | <i>A. kniphofioides</i> Baker<br>(Asphodelaceae)                           | <i>A. parviflora</i> Baker<br>(Asphodelaceae)                                                      | <i>Cineraria vagans</i> Hilliard<br>(Asteraceae) (Amathole Mtns,<br>Katberg Pass & the Elandsberg)                                     | <i>Aspidoglossum dissimile</i><br>(N.E.Br.) Kupicha<br>(Apocynaceae)                   |
| <i>Asparagus microraphis</i><br>(Kunth) Baker<br>(Asparagaceae)                            | <i>A. modesta</i> Reynolds<br>(Asphodelaceae)                              | <i>Argyrobium longifolium</i><br>(Meisn.) Walp. (Fabaceae)                                         | <i>Crocoshia masoniorum</i> (L.Bolus)<br>N.E.Br. (Iridaceae) (Engcobo)                                                                 | <i>A. woodii</i> (Schltr.) Kupicha<br>(Apocynaceae)                                    |
| <i>Aspidonepsis cognata</i><br>(N.E.Br.) Nicholas &<br>Goyder (Apocynaceae)                | <i>A. suprafoliata</i> Pole-Evans<br>(Asphodelaceae)                       | <i>Asclepias schlechteri</i><br>(K.Schum.) N.E.Br.<br>(Apocynaceae)                                | <i>Cyrtanthus mackenii</i> Hook.f. subsp.<br><i>cooperi</i> (Baker) Snijman<br>(Amaryllidaceae) (King William's<br>Town & Stutterheim) | <i>A. xanthosphaerum</i> Hilliard<br>(Apocynaceae)                                     |
| <i>A. reenensis</i> (N.E.Br.)<br>Nicholas & Goyder<br>(Apocynaceae)                        | <i>A. vryheidensis</i> Groenew.<br>(Asphodelaceae)                         | <i>Begonia geranioides</i> Hook.f.<br>(Begoniaceae)                                                | <i>Nerine masoniorum</i> L.Bolus<br>(Amaryllidaceae) (Umtata)                                                                          | <i>Athrixia gerrardii</i> Harv.<br>(Asteraceae)                                        |
| <i>Brownleea galpinii</i> Bolus<br>subsp. <i>major</i> (Bolus)<br>H.P.Linder (Orchidaceae) | <i>Argyrobium pseudotuberosum</i><br>T.J.Edwards (Fabaceae)                | <i>Ceropegia pulchellior</i> Bruyns<br>(Apocynaceae)                                               | <i>N. gibsonii</i> Douglas<br>(Amaryllidaceae) (Cala &<br>Engcobo)                                                                     | <i>Ceropegia breviflora</i> subsp.<br><i>flavida</i> (Schltr.) Bruyns<br>(Apocynaceae) |
| <i>Chlorophytum acutum</i><br>(C.H.Wright) Nordal<br>(Agavaceae)                           | <i>Brownleea galpinii</i> Bolus<br>subsp. <i>galpinii</i><br>(Orchidaceae) | <i>C. scabriflora</i> N.E.Br.<br>(Apocynaceae)                                                     | <i>Phyllica tysonii</i> Pillans var.<br><i>brevifolia</i> Pillans (Rhamnaceae)<br>(Cala to Ugie & Maclear)                             | <i>Crassula tuberella</i> Toelken<br>(Crassulaceae)                                    |

|                                                                                 |                                                                                   |                                                                            |                                                                             |                                                                 |
|---------------------------------------------------------------------------------|-----------------------------------------------------------------------------------|----------------------------------------------------------------------------|-----------------------------------------------------------------------------|-----------------------------------------------------------------|
| <i>Cotula membranifolia</i> illiard<br>(Asteraceae)                             | <i>Bulbine inflata</i> Oberm.<br>(Asphodelaceae)                                  | <i>Cineraria atriplicifolia</i> DC.<br>(Asteraceae)                        | <i>Selago baurii</i> (Hiern) Hilliard<br>(Scrophulariaceae)<br>(Mt. Baziya) | <i>Cyrtanthus obrienii</i> Baker<br>(Amaryllidaceae)            |
| <i>Cyphia tysonii</i> E.Phillips<br>(Lobeliaceae)                               | <i>Cassipourea swaziensis</i><br>Compton<br>(Rhizophoraceae)                      | <i>Clivia gardenii</i> Hook.<br>(Amaryllidaceae)                           |                                                                             | <i>Delosperma gracile</i> L.Bolus<br>(Aizoaceae)                |
| <i>Cyrtanthus flanaganii</i> Baker<br>(Amaryllidaceae)                          | <i>Cyphia corylifolia</i> Harv.<br>(Lobeliaceae)                                  | <i>Dierama pallidum</i> Hilliard<br>(Iridaceae)                            |                                                                             | <i>Dierama latifolium</i> N.E.Br.<br>(Iridaceae)                |
| <i>Disa oreophila</i> Bolus subsp.<br><i>erecta</i> H.P.Linder<br>(Orchidaceae) | <i>Dierama galpinii</i> N.E.Br.<br>(Iridaceae)                                    | <i>Eriosema rossii</i> C.H.Stirt.<br>(Fabaceae)                            |                                                                             | <i>Disa hircicornis</i> Rchb.f.<br>(Orchidaceae)                |
| <i>Drimia calcarata</i> (Baker)<br>Stedje (Hyacinthaceae)                       | <i>D. insigne</i> N.E.Br.<br>(Iridaceae)                                          | <i>Geranium ornithopodioides</i><br>Hilliard & B.L.Burt<br>(Geraniaceae)   |                                                                             | <i>Eulophia meleagris</i> Rchb.f.<br>(Orchidaceae)              |
| <i>Eucomis bicolor</i> Baker<br>(Hyacinthaceae)                                 | <i>D. pictum</i> N.E.Br.<br>(Iridaceae)                                           | <i>G. sparsiflorum</i> R.Knuth<br>(Geraniaceae)                            |                                                                             | <i>Galopina crocylloides</i> Bär ex<br>Schinz (Rubiaceae)       |
| <i>E. humilis</i> Baker<br>(Hyacinthaceae)                                      | <i>D. rhodantha</i> Schltr.<br>(Orchidaceae)                                      | <i>Gladiolus inandensis</i> Baker<br>(Iridaceae)                           |                                                                             | <i>Garuleum latifolium</i> Harv.<br>(Asteraceae)                |
| <i>Gladiolus parvulus</i> Schltr.<br>(Iridaceae)                                | <i>D. zuluensis</i> Rolfe<br>(Orchidaceae)                                        | <i>Gymnosporia uniflora</i><br>Davison (Celastraceae)                      |                                                                             | <i>Geranium subglabrum</i> Hilliard<br>& B.L.Burt (Geraniaceae) |
| <i>Helichrysum hypoleucum</i><br>Harv. (Asteraceae)                             | <i>Disperis cooperi</i> Harv.<br>(Orchidaceae)                                    | <i>Helichrysum natalitium</i> DC.<br>(Asteraceae)                          |                                                                             | <i>Hermannia auricoma</i><br>(Szyszyl.) K.Schum.<br>(Malvaceae) |
| <i>H. nanum</i> Klatt (Asteraceae)                                              | <i>Drimia kniphofioides</i><br>(Baker) J.C.Manning &<br>Goldblatt (Hyacinthaceae) | <i>H. woodii</i> N.E.Br.<br>(Asteraceae)                                   |                                                                             | <i>Hesperantha woodii</i> Baker<br>(Iridaceae)                  |
| <i>Hermannia gerrardii</i> Harv.<br>(Malvaceae)                                 | <i>Erica revoluta</i> (Bolus)<br>L.E.Davidson (Ericaceae)                         | <i>Hilliardia zuurbergensis</i><br>(Oliv.) B.Nord. (Asteraceae)            |                                                                             | <i>Indigofera foliosa</i> E.Mey.<br>(Fabaceae)                  |
| <i>H. oligosperma</i> K.Schum.<br>(Malvaceae)                                   | <i>Gladiolus vernus</i> Oberm.<br>(Iridaceae)                                     | <i>Kniphofia tysonii</i> Baker<br>subsp. <i>tysonii</i><br>(Asphodelaceae) |                                                                             | <i>I. woodii</i> Bolus var. <i>woodii</i><br>(Fabaceae)         |



|                                                                                  |                                                                                   |                                                                                                               |                                                                                                                    |
|----------------------------------------------------------------------------------|-----------------------------------------------------------------------------------|---------------------------------------------------------------------------------------------------------------|--------------------------------------------------------------------------------------------------------------------|
| <i>Hesperantha scopulosa</i><br>Hilliard & B.L.Burt<br>(Iridaceae)               | <i>Helichrysum argyrolepis</i><br>MacOwan (Asteraceae)                            | <i>Ornithogalum princeps</i><br>(Baker) J.C.Manning &<br>Goldblatt (Hyacinthaceae)                            | <i>Kniphofia fibrosa</i> Baker<br>(Asphodelaceae)                                                                  |
| <i>Huttonaea grandiflora</i><br>(Schltr.) Rolfe<br>(Orchidaceae)                 | <i>H. aureum</i> (Houtt.) Merr.<br>var. <i>argenteum</i> Hilliard<br>(Asteraceae) | <i>Phymaspermum pinnatifidum</i><br>(Oliv.) Källersjö<br>(Asteraceae)                                         | <i>Lactuca tysonii</i> (E.Phillips)<br>C.Jeffrey (Asteraceae)                                                      |
| <i>H. oreophila</i> Schltr.<br>(Orchidaceae)                                     | <i>H. aureum</i> (Houtt.) Merr.<br>var. <i>candidum</i> Hilliard<br>(Asteraceae)  | <i>Plectranthus purpuratus</i><br>Harv. subsp. <i>purpuratus</i><br>(Lamiaceae)                               | <i>Leobordea procumbens</i><br>(H.Bolus) B.-E.van Wyk &<br>Boatwr. (Fabaceae)                                      |
| <i>Killickia pilosa</i> (Benth.)<br>Bräuchler, Heubl &<br>Doroszenko (Lamiaceae) | <i>H. interjacens</i> Hilliard<br>(Asteraceae)                                    | <i>Pseudoprospero firmifolium</i><br>(Baker) Speta subsp.<br><i>natalensis</i> J.C.Manning<br>(Hyacinthaceae) | <i>Lessertia perennans</i> (Jacq.) DC.<br>var. <i>sericea</i> L.Bolus<br>(Fabaceae)                                |
| <i>Kniphofia angustifolia</i><br>(Baker) Codd<br>(Asphodelaceae)                 | <i>H. opacum</i> Klatt<br>(Asteraceae)                                            | <i>Rhynchosia connata</i> Baker f.<br>(Fabaceae)                                                              | <i>Listia solitudinis</i> (Dummer)<br>B.-E.van Wyk & Boatwr.<br>(Fabaceae)                                         |
| <i>K. brachystachya</i> (Zahlbr.)<br>Codd (Asphodelaceae)                        | <i>Heterosamara galpinii</i><br>(Hook.f.) Paiva<br>(Polygalaceae)                 | <i>Riocreuxia flanaganii</i> Schltr.<br>var. <i>alexandrina</i> H.E.Huber<br>(Apocynaceae)                    | <i>Lotononis carnosus</i> (Eckl. &<br>Zeyh.) Benth. subsp.<br><i>condensata</i> (Harv.) B.-E.van<br>Wyk (Fabaceae) |
| <i>K. breviflora</i> Baker<br>(Asphodelaceae)                                    | <i>Hibiscus barbosae</i> Exell<br>(Malvaceae)                                     | <i>R. woodii</i> N.E.Br.<br>(Apocynaceae)                                                                     | <i>L. viminea</i> (E.Mey.) B.-E.van<br>Wyk (Fabaceae)                                                              |
| <i>Jamesbrittenia breviflora</i><br>(Schltr.) Hilliard<br>(Scrophulariaceae)     | <i>Jamesbrittenia silenoides</i><br>(Hilliard) Hilliard<br>(Scrophulariaceae)     | <i>Schizoglossum peglerae</i><br>N.E.Br. (Apocynaceae)                                                        | <i>Melolobium alpinum</i> Eckl. &<br>Zeyh. (Fabaceae)                                                              |
| <i>Manulea florifera</i> Hilliard &<br>B.L.Burt<br>(Scrophulariaceae)            | <i>Khadia alticola</i> Chess. &<br>H.E.K.Hartmann<br>(Aizoaceae)                  | <i>Selago hyssopifolia</i> E.Mey.<br>subsp. <i>retrotricha</i> Hilliard<br>(Scrophulariaceae)                 | <i>Miraglossum anomalum</i><br>(N.E.Br.) Kupicha<br>(Apocynaceae)                                                  |
| <i>Miraglossum superbum</i><br>Kupicha (Apocynaceae)                             | <i>Kniphofia galpinii</i> Baker<br>(Asphodelaceae)                                | <i>Senecio dregeanus</i> DC.<br>(Asteraceae)                                                                  | <i>Orbea gerstneri</i> (Letty) Bruyns<br>subsp. <i>gerstneri</i><br>(Apocynaceae)                                  |
| <i>Moraea albicuspa</i> Goldblatt<br>(Iridaceae)                                 | <i>K. fluviatilis</i> Codd<br>(Asphodelaceae)                                     | <i>Sisyranthus anceps</i> Schltr.<br>(Apocynaceae)                                                            | <i>Scabiosa tysonii</i> L.Bolus<br>(Dipsacaceae)                                                                   |

|                                                                                      |                                                                                                          |                                                        |                                                                              |
|--------------------------------------------------------------------------------------|----------------------------------------------------------------------------------------------------------|--------------------------------------------------------|------------------------------------------------------------------------------|
| <i>Ornithogalum candicans</i><br>(Baker) J.C.Manning &<br>Goldblatt (Hyacinthaceae)  | <i>K. multiflora</i> J.M.Wood &<br>M.S.Evans<br>(Asphodelaceae)                                          | <i>S. fanninia</i> N.E.Br.<br>(Apocynaceae)            | <i>Sclerochiton odoratissimus</i><br>Hilliard (Acanthaceae)                  |
| <i>O. diphyllum</i> Baker<br>(Hyacinthaceae)                                         | <i>Ledebouria pilosa</i> (Van der<br>Merwe) J.C.Manning &<br>Goldblatt (Hyacinthaceae)                   | <i>Stachys tubulosa</i> MacOwan<br>(Lamiaceae)         | <i>Selago elongata</i> Hilliard<br>(Scrophulariaceae)                        |
| <i>O. regale</i> (Hilliard &<br>B.L.Burt) J.C.Manning &<br>Goldblatt (Hyacinthaceae) | <i>Leucospermum gerrardii</i><br>Stapf (Proteaceae)                                                      | <i>Tephrosia inandensis</i><br>H.M.L.Forbes (Fabaceae) | <i>S. trinervia</i> E.Mey.<br>(Scrophulariaceae)                             |
| <i>Phymaspermum woodii</i><br>(Thell.) Källersjö<br>(Asteraceae)                     | <i>Margelliantha caffra</i> (Bolos)<br>P.J.Cribb & J.Stewart<br>(Orchidaceae)                            |                                                        | <i>Senecio tysonii</i> MacOwan<br>(Asteraceae)                               |
| <i>Schizochilus bulbinella</i><br>(Rchb.f.) Bolus<br>(Orchidaceae)                   | <i>Pachycarpus concolor</i><br>E.Mey. subsp.<br><i>transvaalensis</i> (Schltr.)<br>Goyder (Apocynaceae)  |                                                        | <i>Sisyranthus saundersiae</i><br>N.E.Br. (Apocynaceae)                      |
| <i>S. flexuosus</i> Harv. ex Rolfe<br>(Orchidaceae)                                  | <i>Pearsonia sessilifolia</i><br>(Harv.) Dummer subsp.<br><i>filifolia</i> (Bolos) Polhill<br>(Fabaceae) |                                                        | <i>Solanum macrocarpon</i> L.<br>(Solanaceae)                                |
| <i>Schizoglossum elingue</i><br>N.E.Br. subsp. <i>elingue</i><br>(Apocynaceae)       | <i>Protea comptonii</i> Beard<br>(Proteaceae)                                                            |                                                        | <i>Stachys rudatisii</i> Skan<br>(Lamiaceae)                                 |
| <i>S. elingue</i> N.E.Br. subsp.<br><i>purpureum</i> Kupicha<br>(Apocynaceae)        | <i>Scolopia oreophila</i><br>(Sleumer) Killick<br>(Salicaceae)                                           |                                                        | <i>Streptocarpus grandis</i> N.E.Br.<br>subsp. <i>grandis</i> (Gesneriaceae) |
| <i>Selago monticola</i> J.M.Wood<br>& M.S.Evans<br>(Scrophulariaceae)                | <i>Senecio mbuluzensis</i><br>Compton (Asteraceae)                                                       |                                                        | <i>S. johannis</i> L.L.Britten<br>(Gesneriaceae)                             |
| <i>Senecio ingeliensis</i> Hilliard<br>(Asteraceae)                                  | <i>Stachys erectiuscula</i> Gürke<br>(Lamiaceae)                                                         |                                                        | <i>S. prolixus</i> C.B.Clark<br>(Gesneriaceae)                               |
| <i>S. parentalis</i> Hilliard &<br>B.L.Burt (Asteraceae)                             | <i>Syncolostemon foliosus</i><br>(S.Moore) D.F.Otieno<br>(Lamiaceae)                                     |                                                        | <i>Thesium cornigerum</i> A.W.Hill.<br>(Santalaceae)                         |

|                                                                               |                                                               |
|-------------------------------------------------------------------------------|---------------------------------------------------------------|
| <i>Streptocarpus pusillus</i> Harv.<br>ex C.B.Clarke<br>(Gesneriaceae)        | <i>Wahlenbergia pinnata</i><br>Compton<br>(Campanulaceae)     |
| <i>Tenaxia guillarmodiae</i><br>(Conert) N.P.Barker &<br>H.P.Linder (Poaceae) | <i>Watsonia latifolia</i> N.E.Br.<br>ex Oberm. (Iridaceae)    |
| <i>Tephrosia marginella</i><br>H.M.L.Forbes (Fabaceae)                        | <i>Zaluzianskya distans</i> Hiern<br>(Scrophulariaceae)       |
|                                                                               | <i>Z. natalensis</i> Bernh.<br>(Scrophulariaceae)             |
|                                                                               | <i>Z. pilosa</i> Hilliard &<br>B.L.Burt<br>(Scrophulariaceae) |

<sup>1</sup> Some taxa, although represented in the KZN Midlands, have a more significant station in the DMC and should therefore be recognized as DMC near-endemics. This category is especially relevant given that certain taxa, once regarded as Drakensberg Alpine Centre endemics [43], no longer occur exclusively in the redefined DMC but also occur in the GMC. See also Carbutt [15] and Carbutt and Edwards [43].

<sup>2</sup> Several taxa occurring in the KZN Midlands have a significant presence in either Limpopo, northern and central Mpumalanga and/or Eswatini, beyond the northern border of the GMC.

<sup>3</sup> A suite of plant taxa extends from the KZN Midlands into the KZN coastal belt, and less occasionally into the Eastern Cape coastal lowlands (particularly Pondoland). Or alternatively, some taxa are centred on the coastal plain bordering the GMC but are not stationed in the GMC.

<sup>4</sup> Several taxa occur exclusively just beyond the southern boundary of the GMC in the Eastern Cape and are therefore Eastern Cape endemics.

<sup>5</sup> Several taxa were marginally close to being characterized as GMC endemics but either failed to achieve an EI score of > 97% or were excluded due to “poor fit”. They also did not conform to a particular phytogeographic pattern evident in columns 1–4.
